# Supplementary material for: A Meta-Analysis and Genome-Wide Association Study of Platelet Count and Mean Platelet Volume in African Americans
Source: PubMed Central journal article supplement (PMC3299192; doi:10.1371/journal.pgen.1002491), 2012-03-08

**Figure S1 (A-J): Negative log(10) statistical significance plots of the each local region with 500 kbp on either side of the top SNP significantly associated with platelet count**

Chromosomal position is on x-axis and  $-\log(10)$  of p-value is on the y-axis. The color of a circle is based on the  $r^2$  from HapMap II data. A gray circle represents a SNP for which  $r^2$  data is not available from HapMap II. These plots were generated using LocusZoom (<http://csg.sph.umich.edu/locuszoom/>).

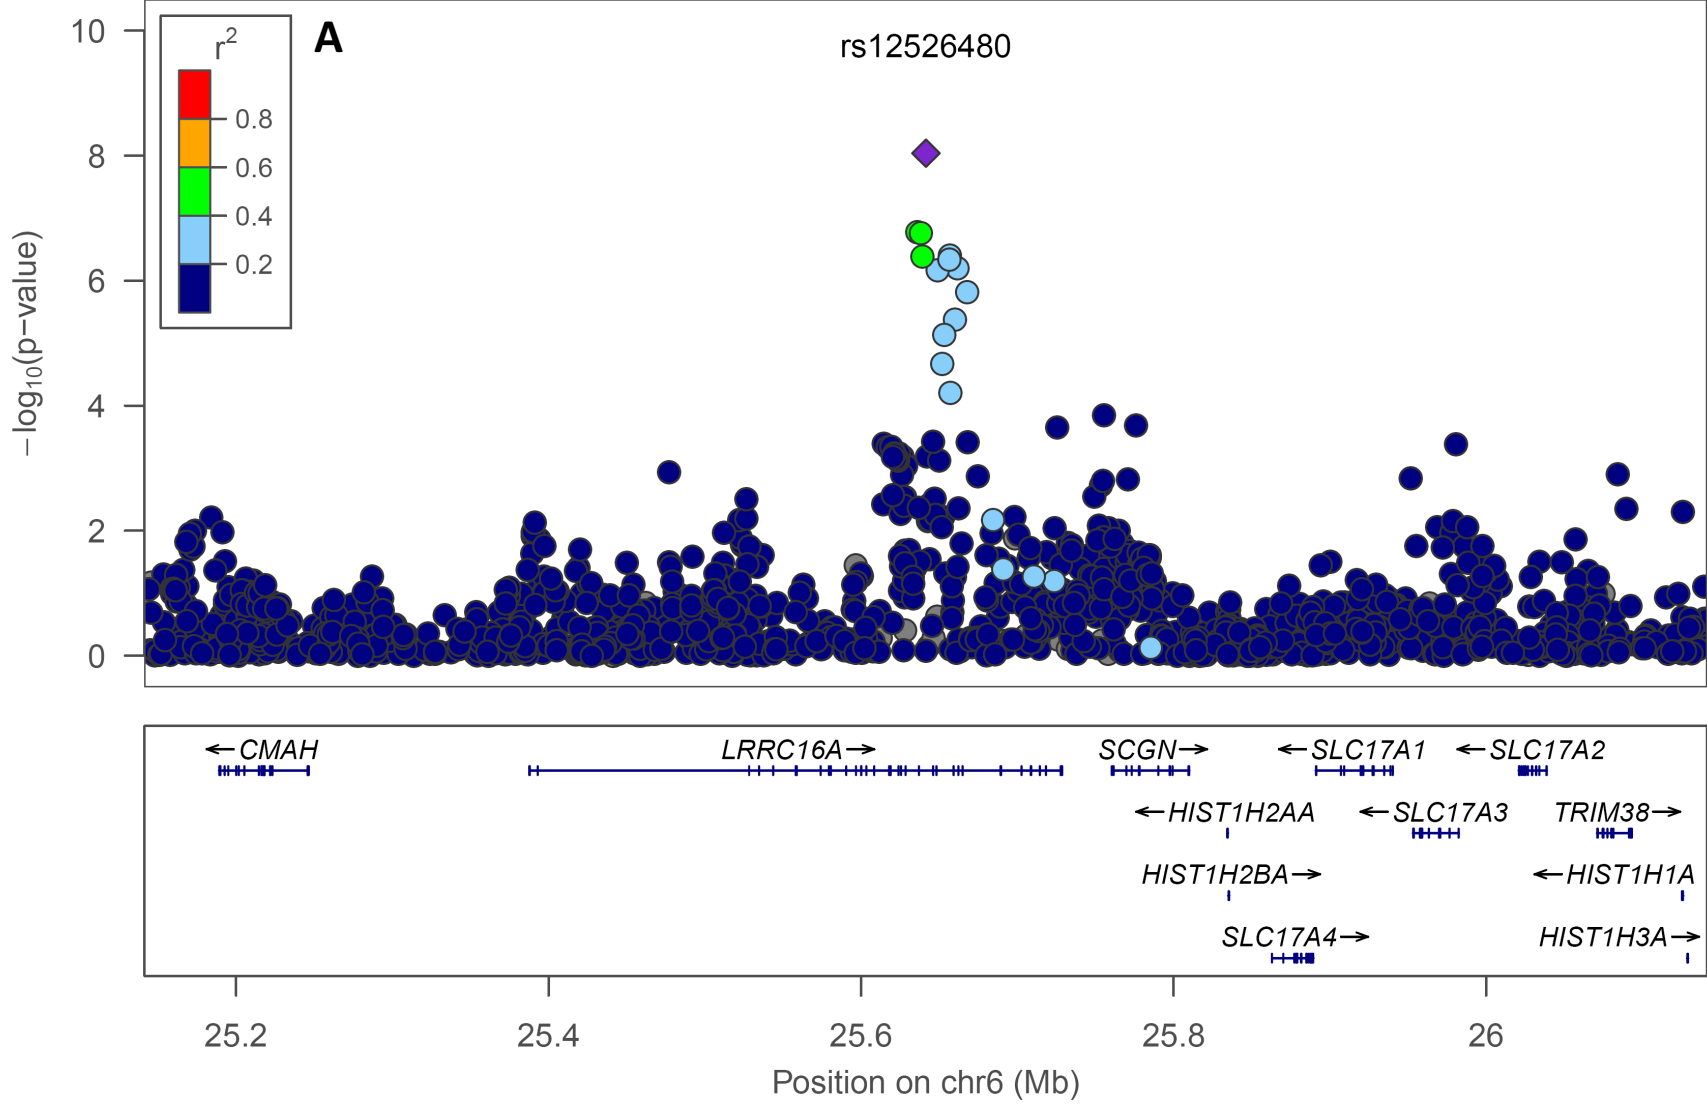

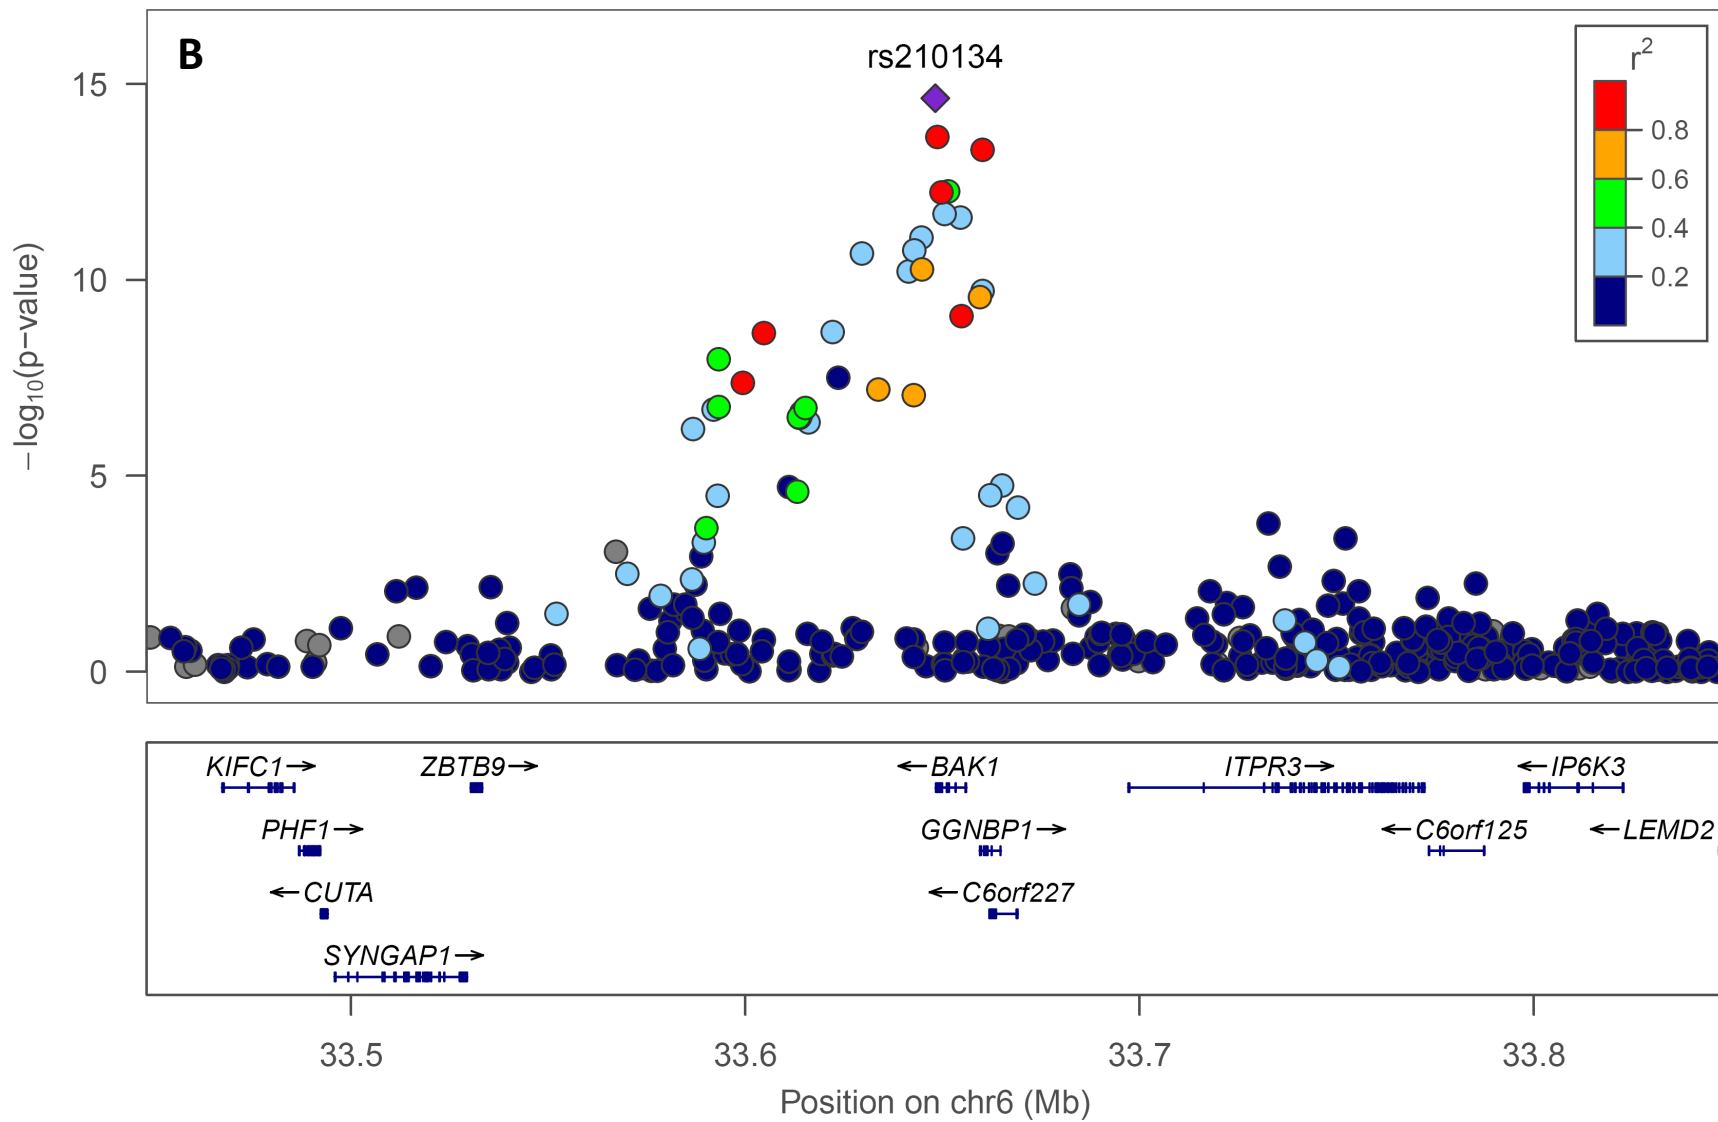

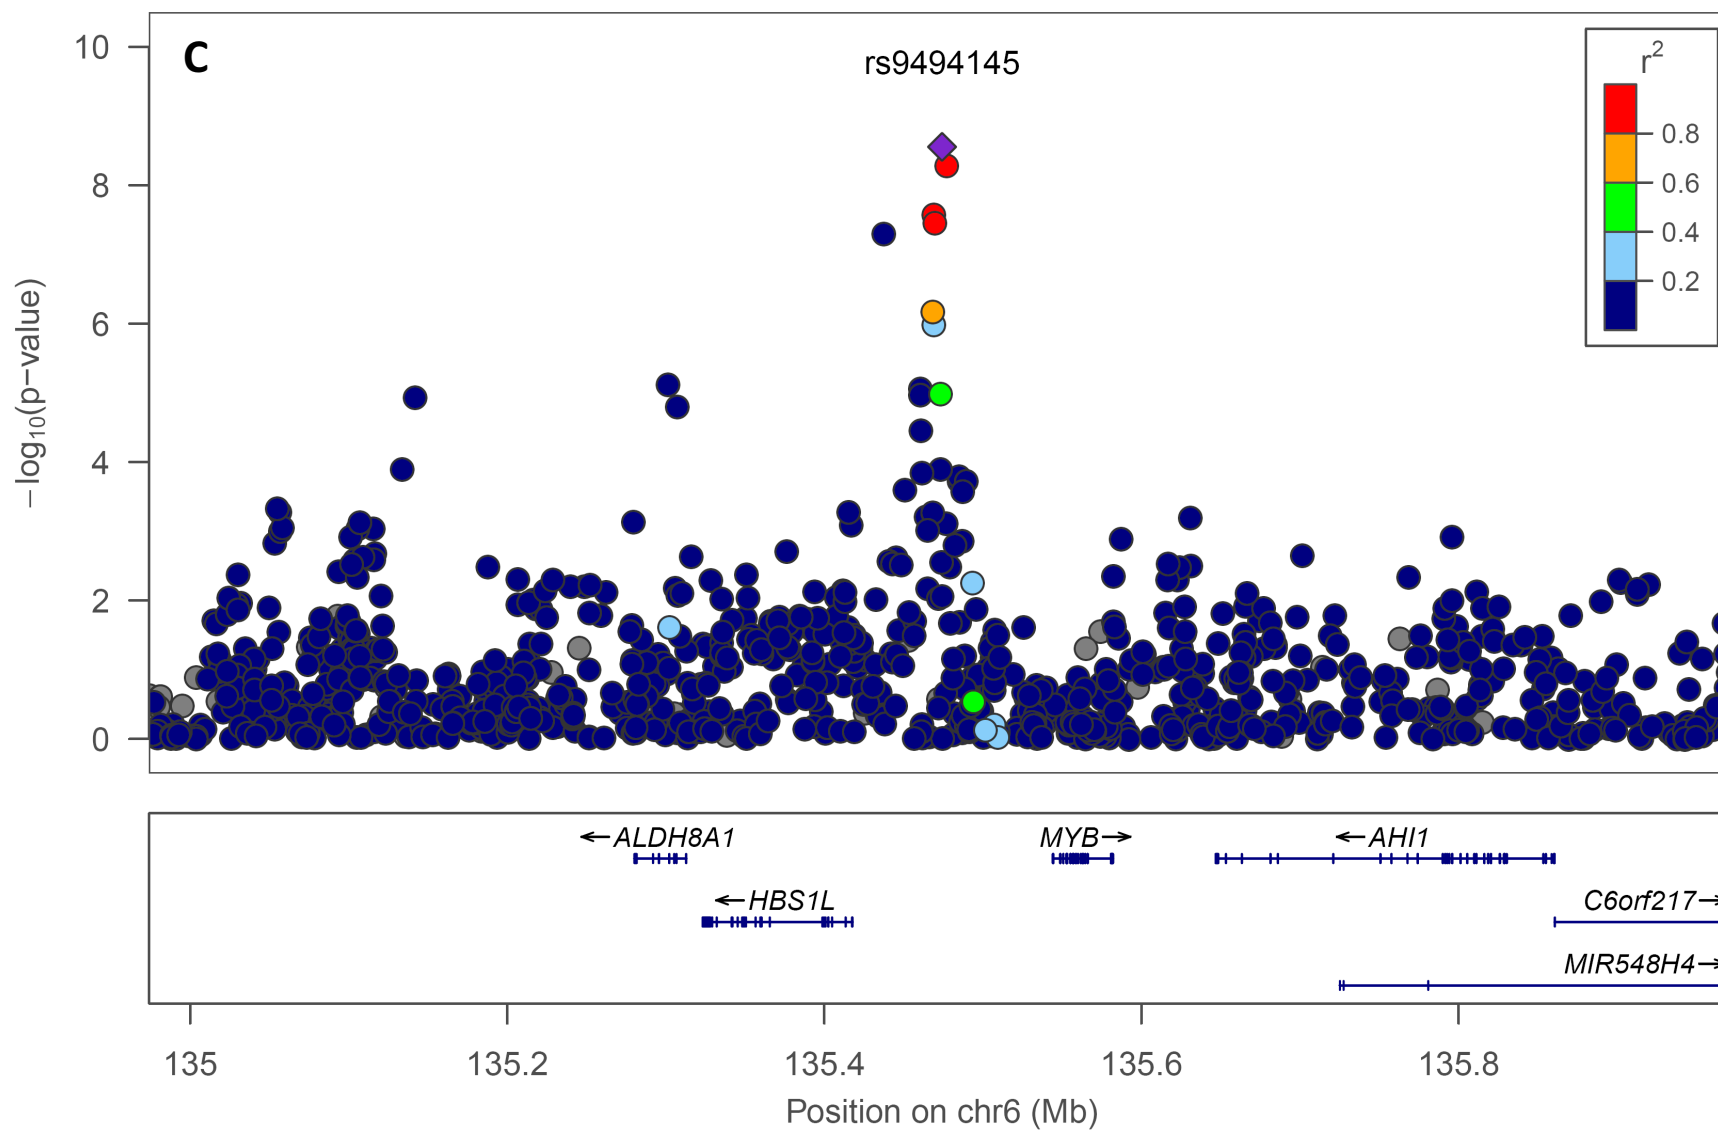

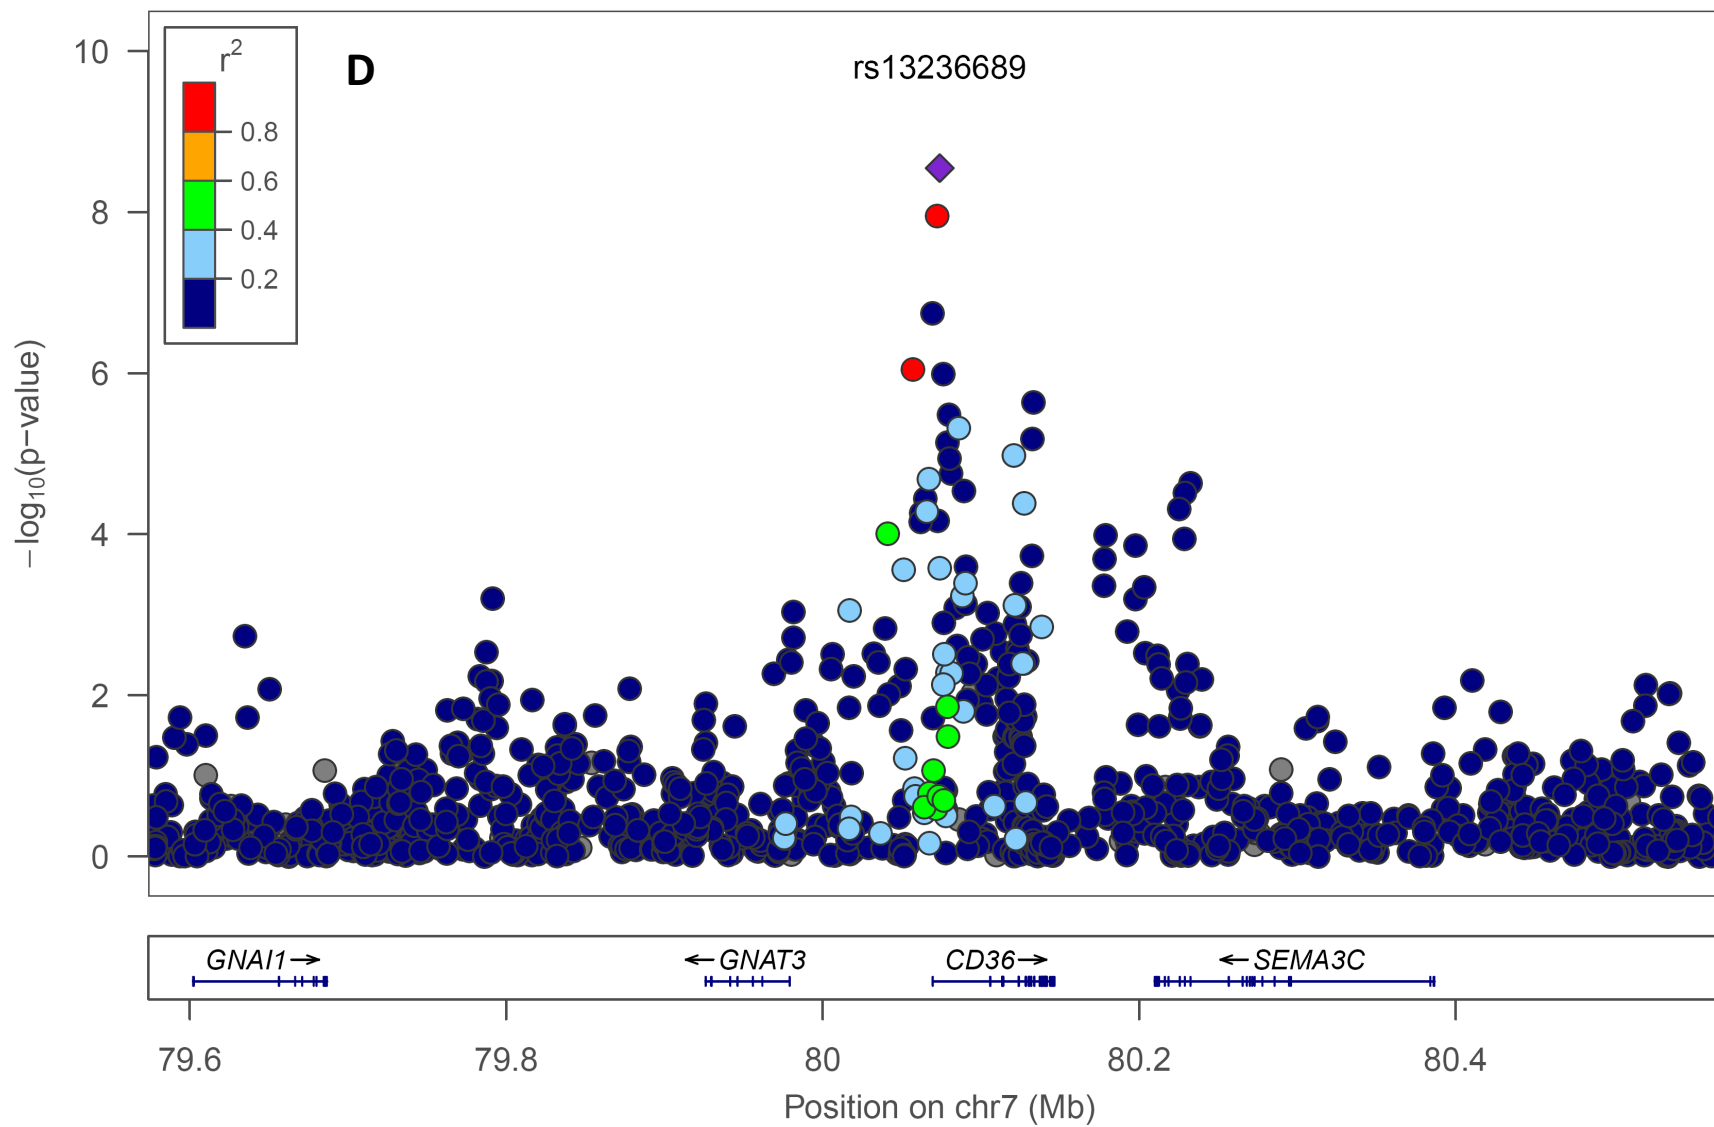

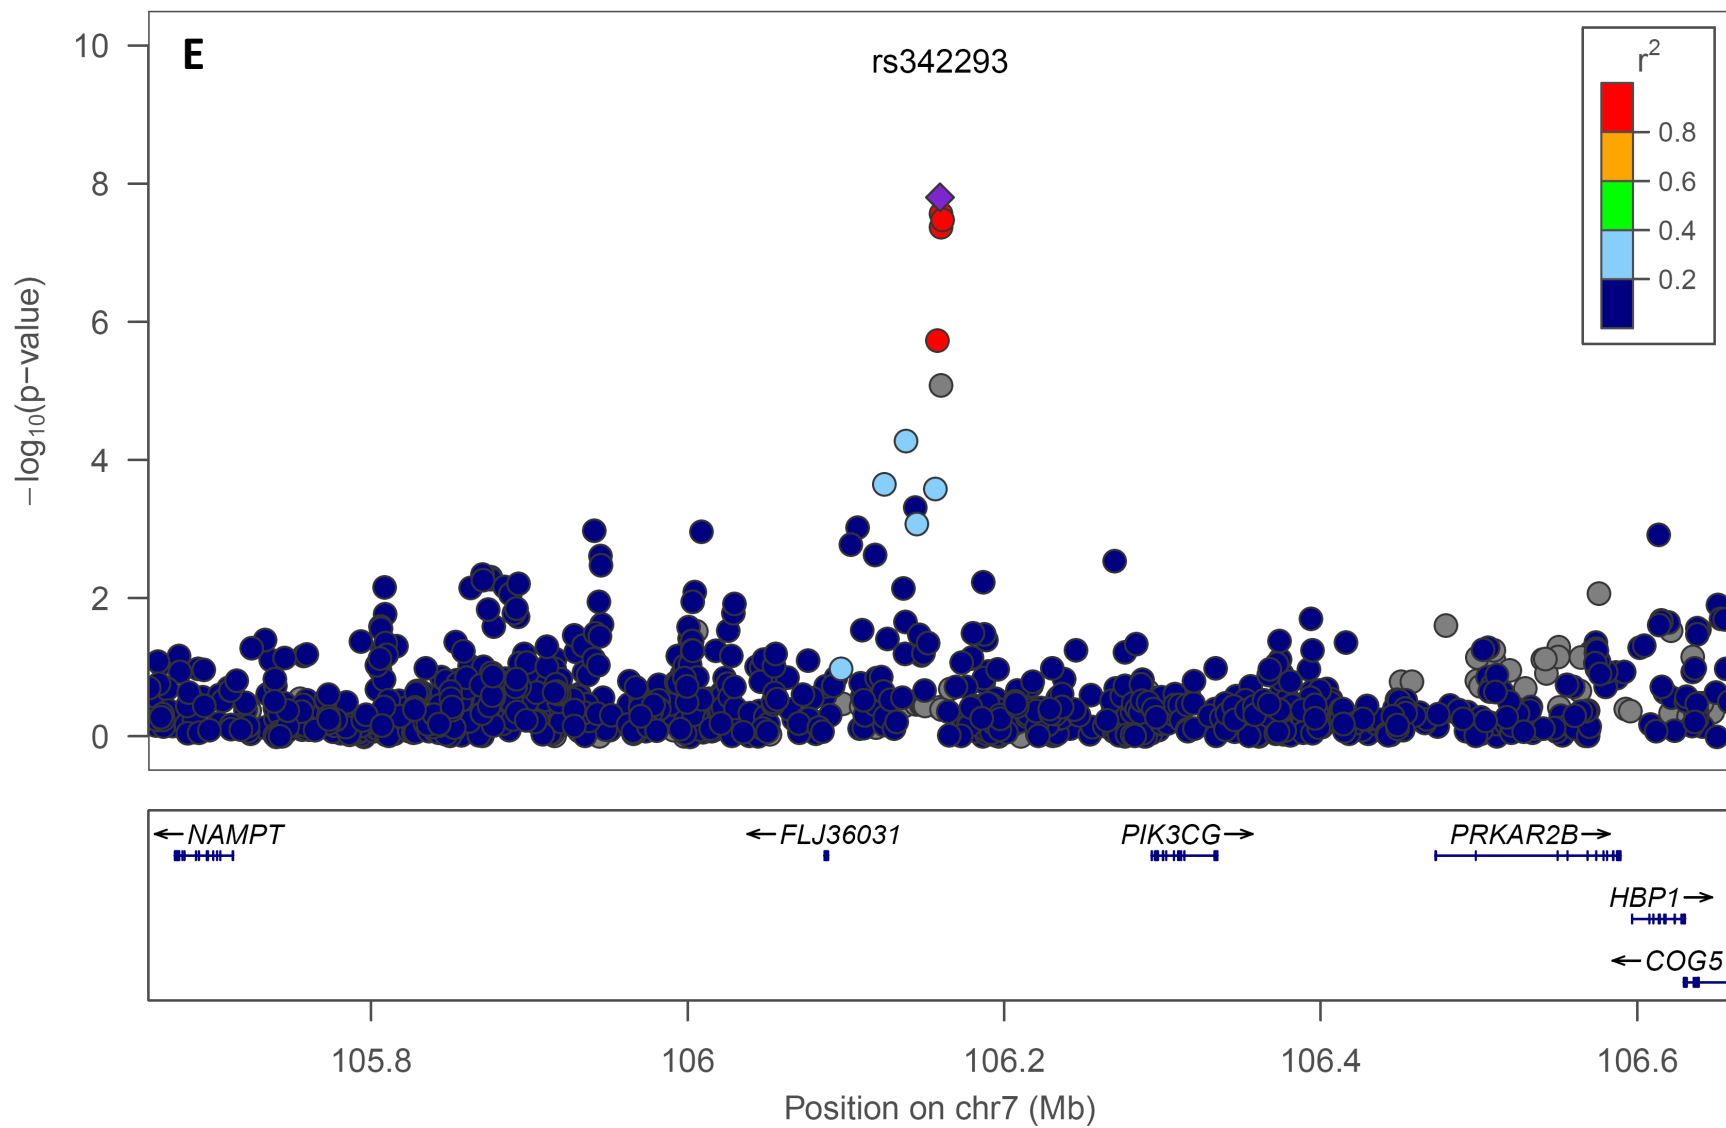

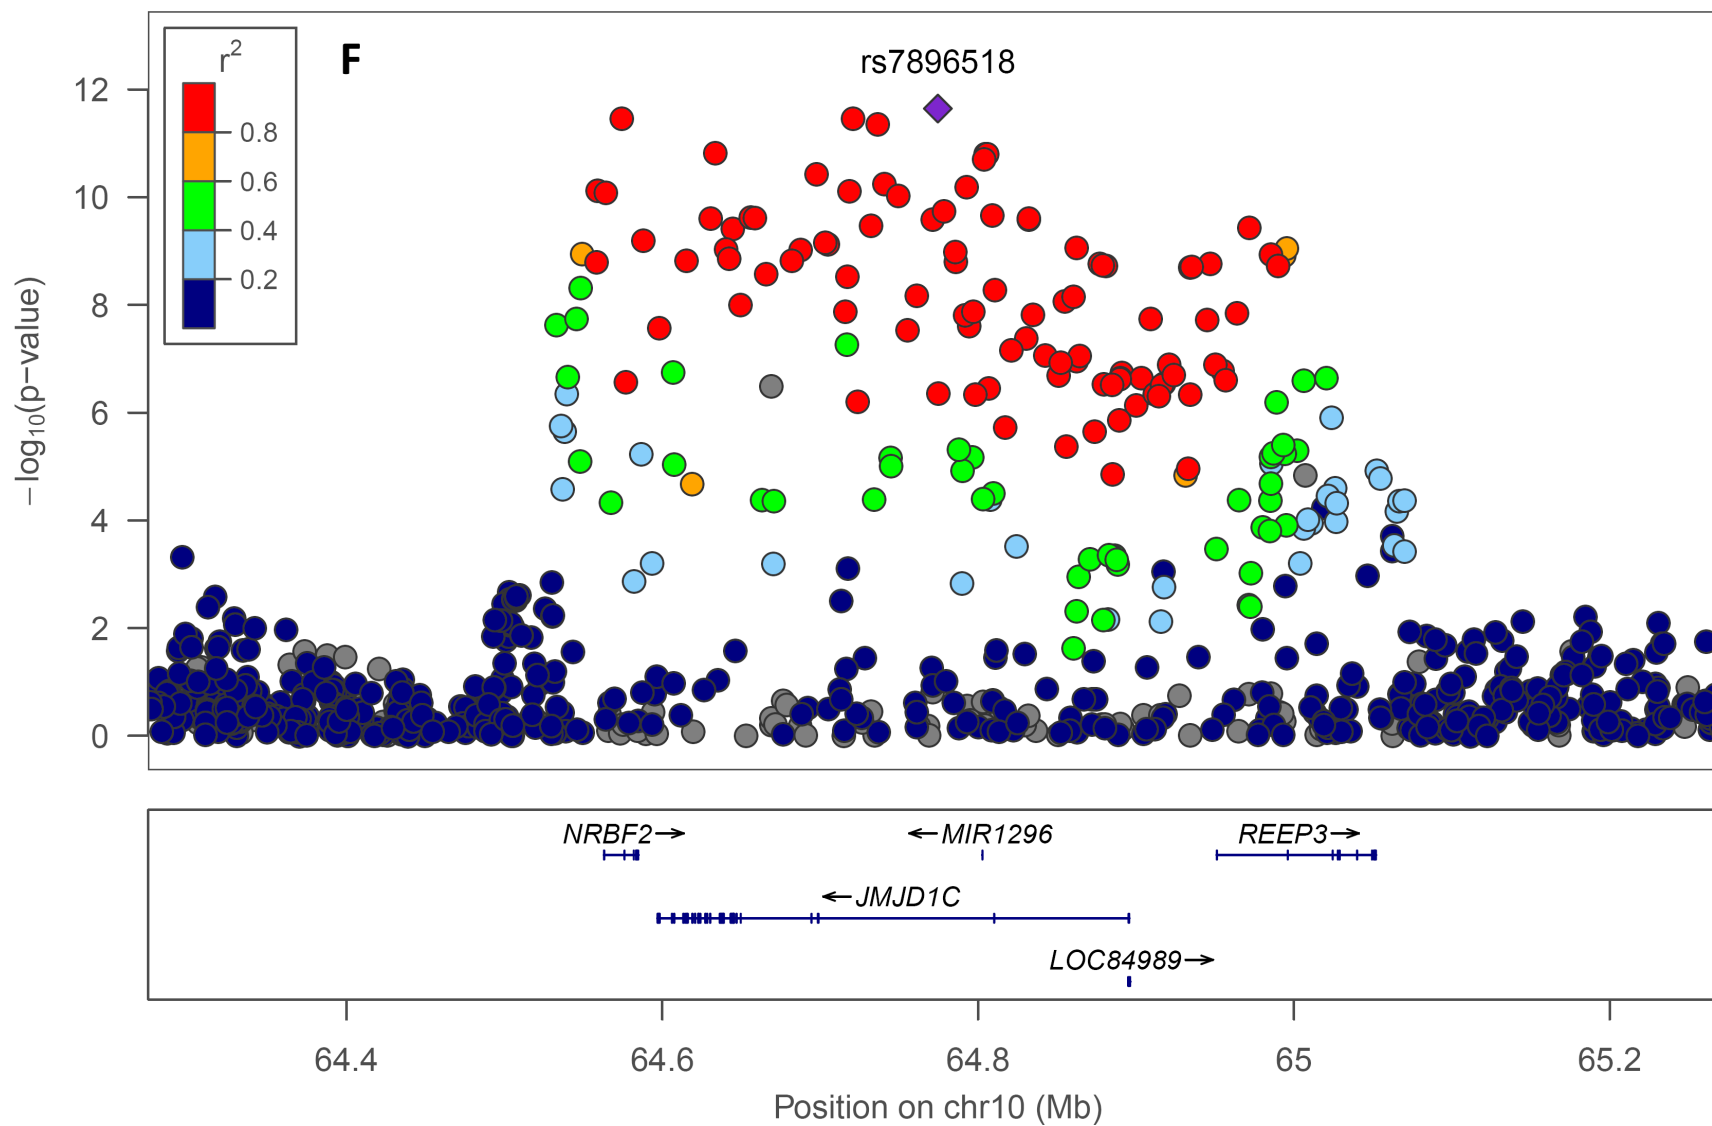

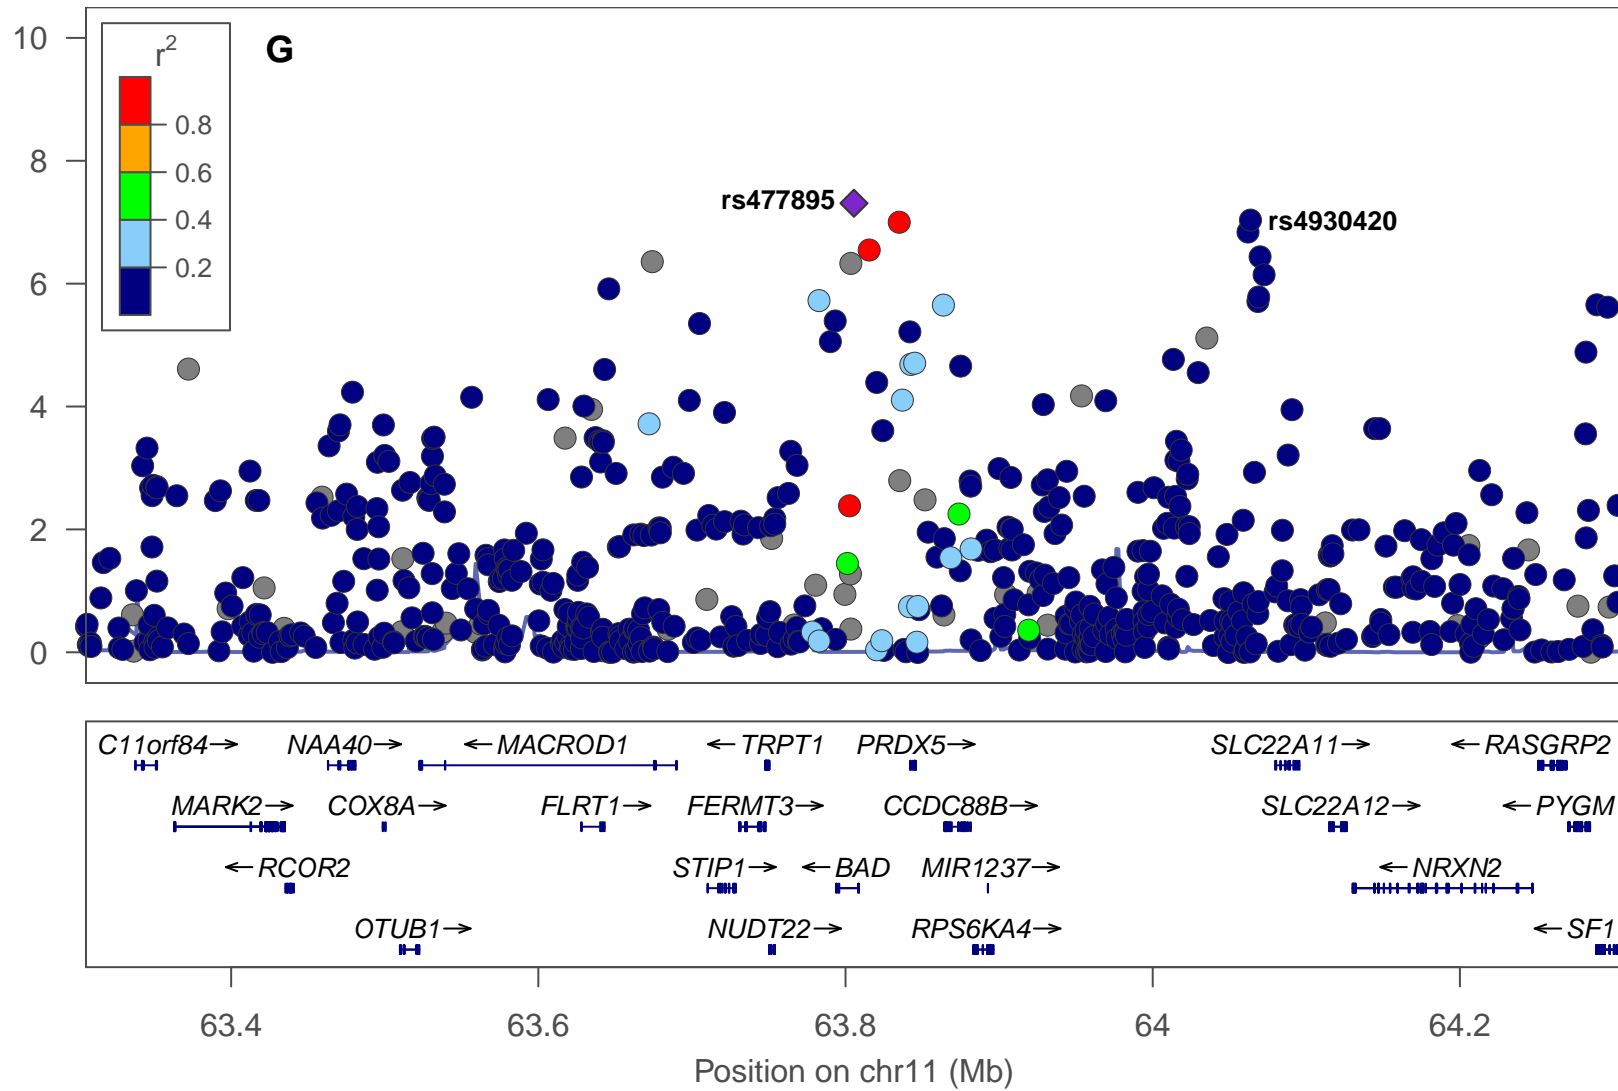



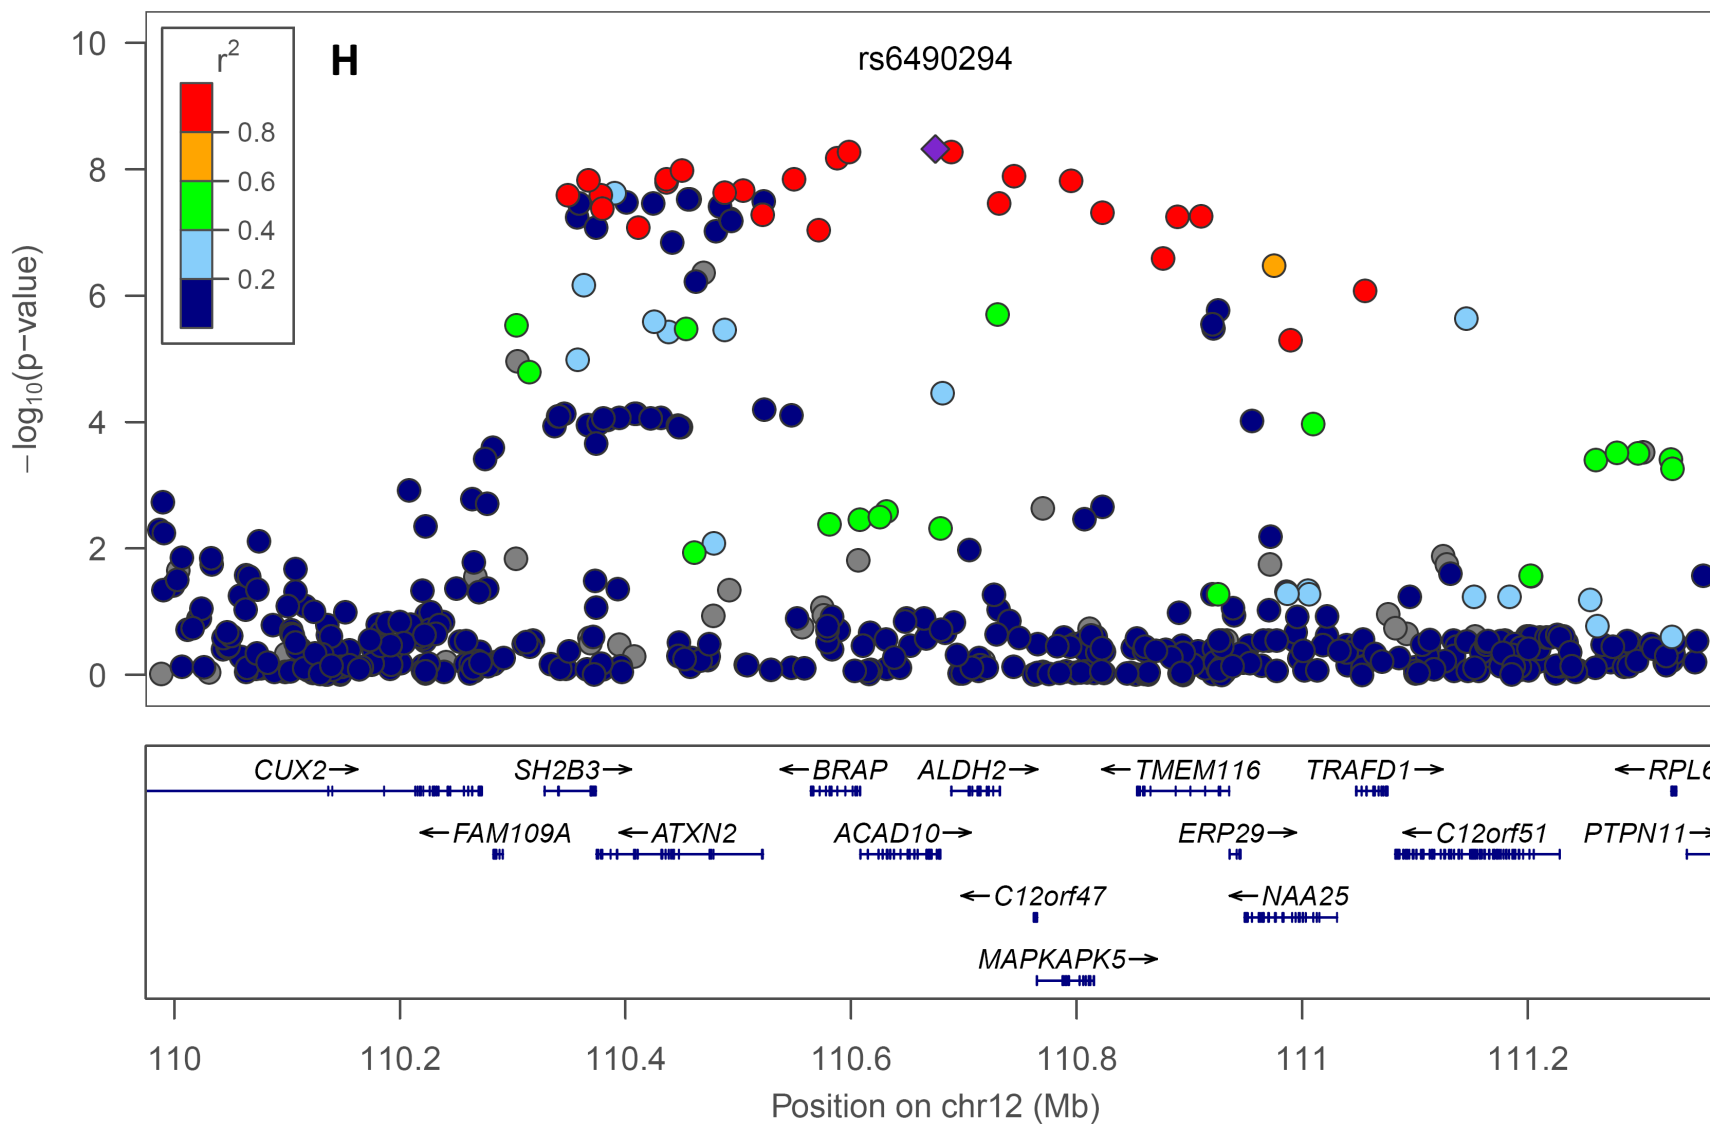

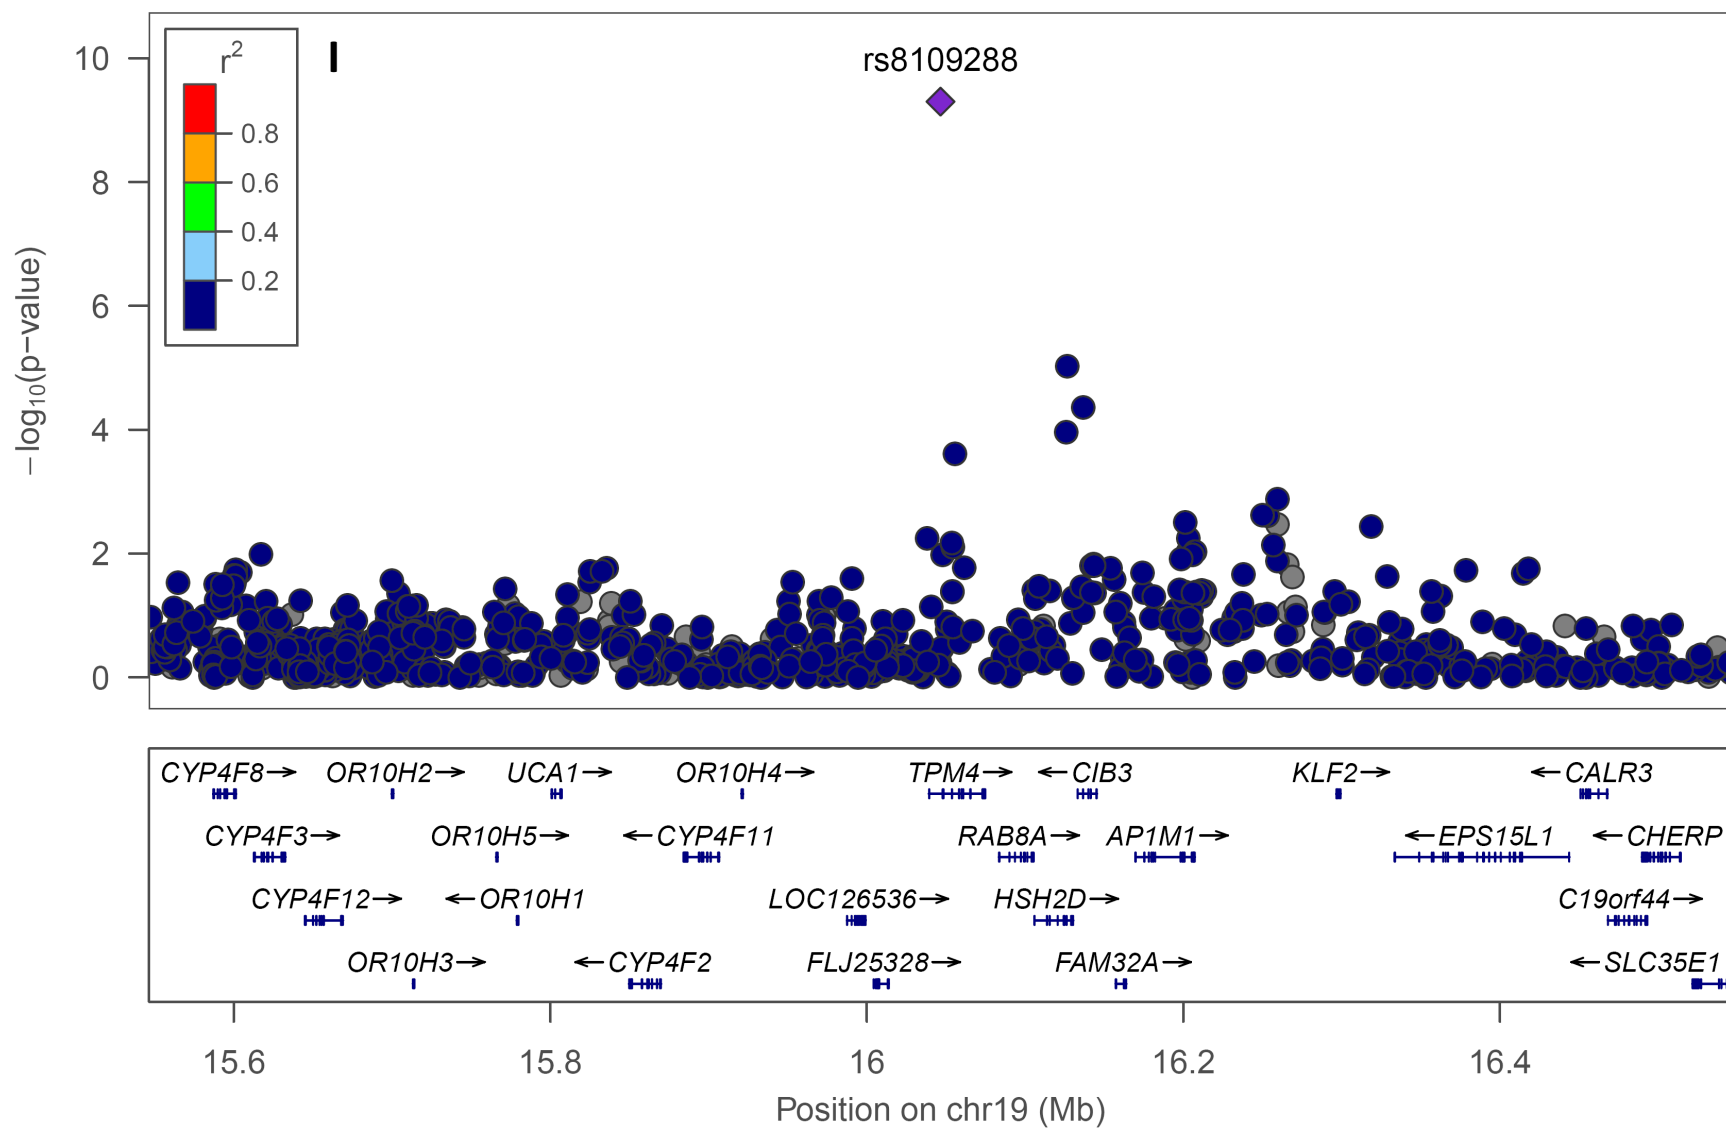

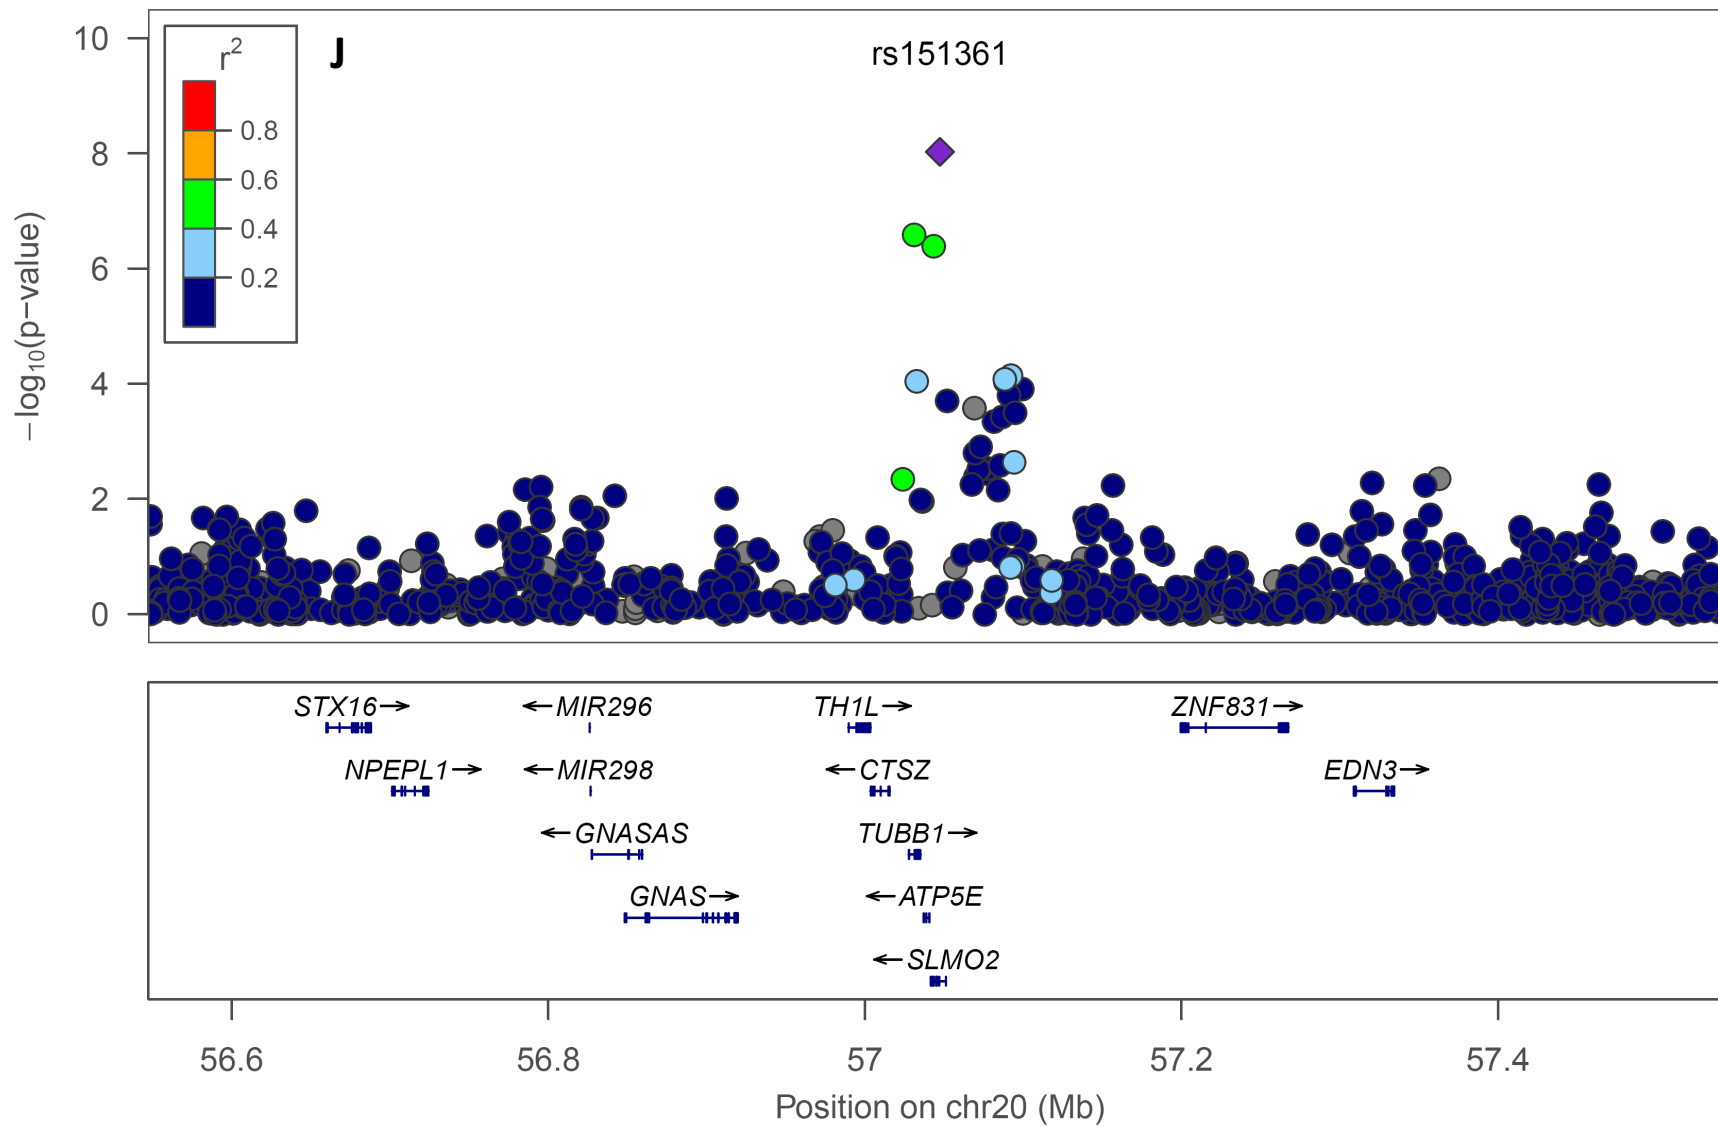

Supplement: pgen.1002491.s001.pdf [file pgen.1002491.s001.pdf]
