# Supplementary material for: A Meta-Analysis and Genome-Wide Association Study of Platelet Count and Mean Platelet Volume in African Americans
Source: PubMed Central journal article supplement (PMC3299192; doi:10.1371/journal.pgen.1002491), 2012-03-08

**Figure S3 (A-G): QQ plots of individual studies for platelet count (PLT)**

Blue dots are SNPs plotted on the x-axis of expected p-value under the null hypothesis against observed p-value in the study (p-values are plotted here as negative logarithm 10). Red diagonal line represents the line of unity, the region where expected and observed p-values are the same. Black lines above and below the red diagonal line bound 95% confidence intervals.

**QQ-Plot of PLT CARDIA**

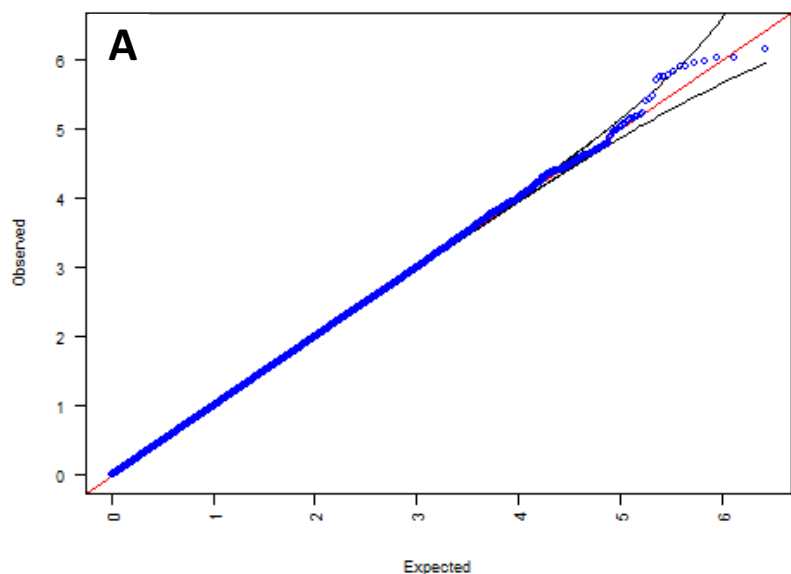

**QQ-Plot of PLT HANDLS**

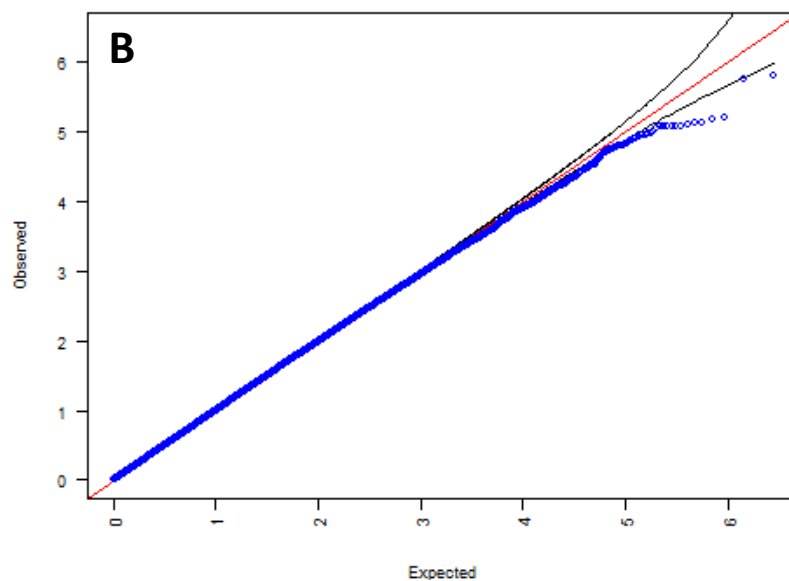

**QQ-Plot of PLT WHI**

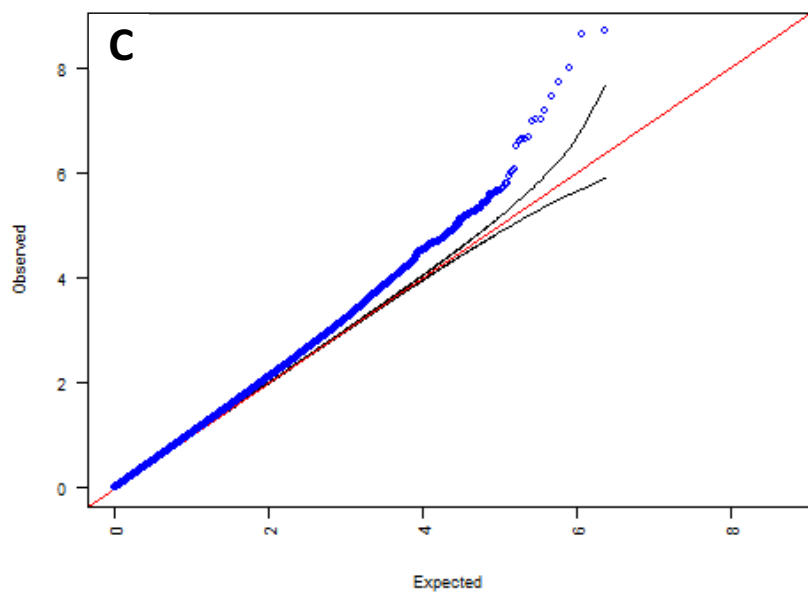

**QQ-Plot of PLT Health ABC**

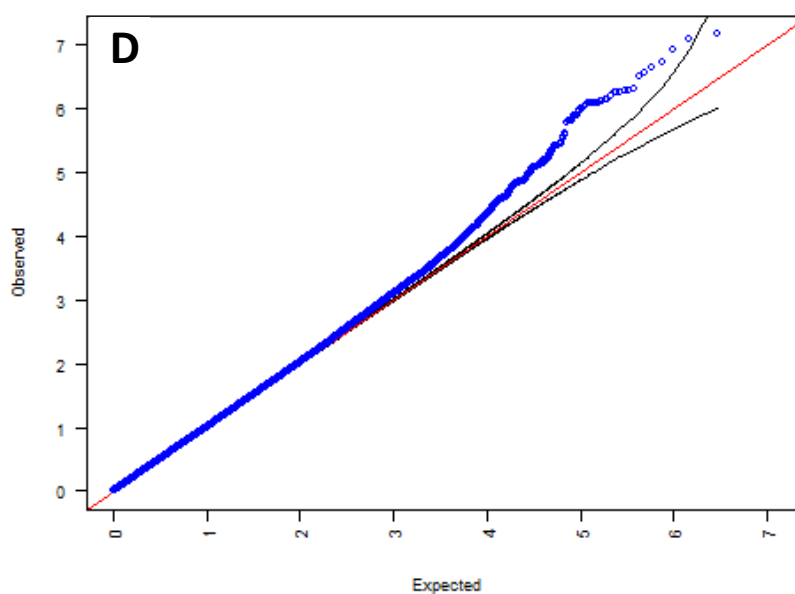

QQ-Plot of PLT GeneSTAR

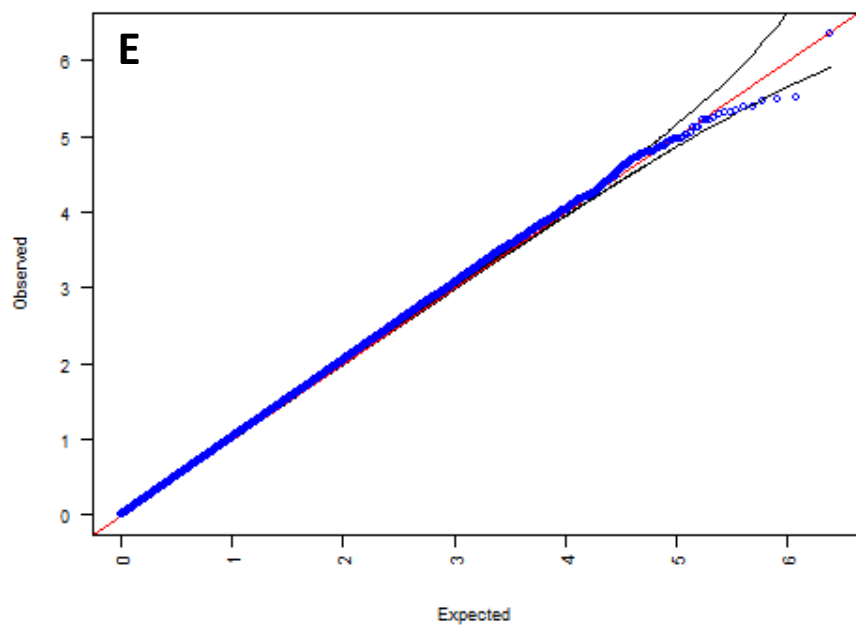

QQ-Plot of PLT JHS

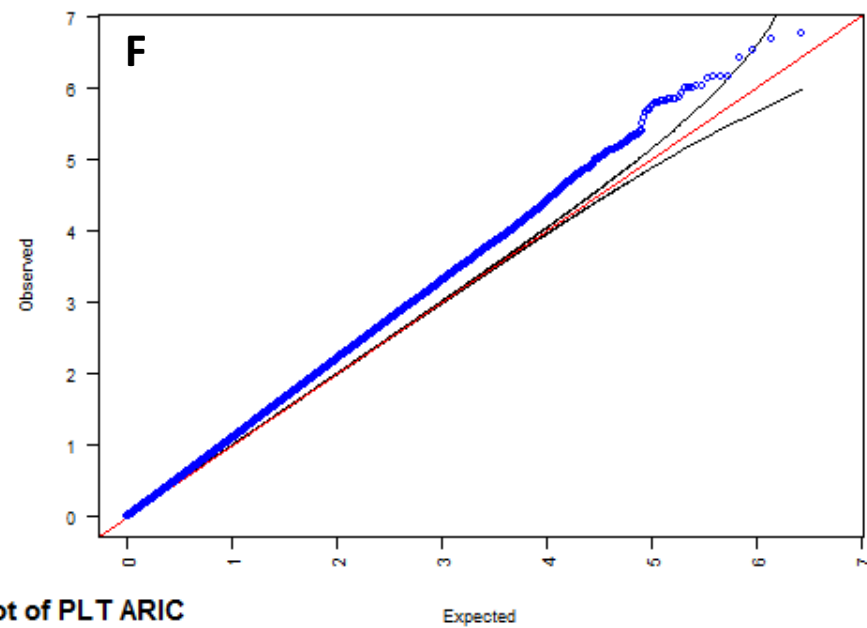

QQ-Plot of PLT ARIC

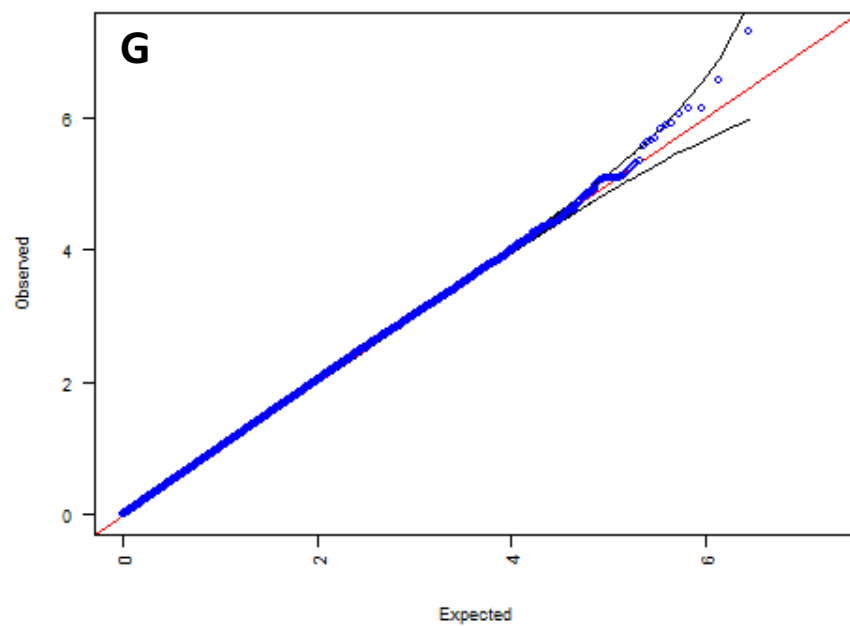

Supplement: pgen.1002491.s003.pdf [file pgen.1002491.s003.pdf]
