# Supplementary material for: A Meta-Analysis and Genome-Wide Association Study of Platelet Count and Mean Platelet Volume in African Americans
Source: PubMed Central journal article supplement (PMC3299192; doi:10.1371/journal.pgen.1002491), 2012-03-08
Supplement: pgen.1002491.s005.pdf [file pgen.1002491.s005.pdf]

**Table S1:** Genomic inflation factors for all GWAS analyses included in the meta-analysis

| <b>Study</b>      | <b>Platelet count</b> | <b>MPV</b> |
|-------------------|-----------------------|------------|
| <b>ARIC</b>       | 1.016                 | 1.015      |
| <b>CARDIA</b>     | 1.000                 | NA         |
| <b>GeneSTAR</b>   | 1.031                 | 1.03       |
| <b>HANDLS</b>     | 0.994                 | 0.98       |
| <b>Health ABC</b> | 1.012                 | 1.03       |
| <b>JHS</b>        | 1.125                 | 1.01       |
| <b>WHI</b>        | 1.060                 | NA         |

NA = not applicable
