# Supplementary material for: A Meta-Analysis and Genome-Wide Association Study of Platelet Count and Mean Platelet Volume in African Americans
Source: PubMed Central journal article supplement (PMC3299192; doi:10.1371/journal.pgen.1002491), 2012-03-08
Supplement: pgen.1002491.s006.pdf [file pgen.1002491.s006.pdf]

**Table S2:** List of all SNPs with p-values < 10<sup>-6</sup> in the regions that were significant at GWAS threshold in platelet count meta-analysis

| SNP        | Chr | Position | Gene     | Role   | Coded Allele | Allele Frequency | Effect Size (SE) | P-value                 | Het-P (I-square) | N     |
|------------|-----|----------|----------|--------|--------------|------------------|------------------|-------------------------|------------------|-------|
| rs214053   | 6   | 25635942 | LRRRC16A | intron | T            | 56.6%            | 3.729 (0.712)    | 1.64 x 10 <sup>-7</sup> | 0.37 (0)         | 16452 |
| rs214056   | 6   | 25638063 | LRRRC16A | intron | C            | 43.4%            | -3.719 (0.711)   | 1.72 x 10 <sup>-7</sup> | 0.36 (0)         | 16452 |
| rs214057   | 6   | 25639112 | LRRRC16A | intron | T            | 59.7%            | 3.578 (0.706)    | 4.04 x 10 <sup>-7</sup> | 0.46 (0)         | 16452 |
| rs12526480 | 6   | 25641513 | LRRRC16A | intron | T            | 69.5%            | 4.386 (0.763)    | 9.15 x 10 <sup>-9</sup> | 0.62 (0)         | 16447 |
| rs214065   | 6   | 25648906 | LRRRC16A | intron | A            | 40.2%            | -3.511 (0.706)   | 6.71 x 10 <sup>-7</sup> | 0.46 (0)         | 16389 |
| rs431659   | 6   | 25653130 | LRRRC16A | intron | A            | 50.7%            | 3.134 (0.699)    | 7.28 x 10 <sup>-6</sup> | 0.83 (0)         | 16452 |
| rs441460   | 6   | 25656267 | LRRRC16A | intron | A            | 49.2%            | -3.475 (0.689)   | 4.57 x 10 <sup>-7</sup> | 0.68 (0)         | 16414 |
| rs368638   | 6   | 25656552 | LRRRC16A | intron | A            | 50.9%            | 3.500 (0.690)    | 3.91 x 10 <sup>-7</sup> | 0.69 (0)         | 16451 |
| rs118855   | 6   | 25659861 | LRRRC16A | intron | A            | 47.2%            | -3.248 (0.706)   | 4.18 x 10 <sup>-6</sup> | 0.84 (0)         | 16452 |
| rs214048   | 6   | 25661695 | LRRRC16A | intron | A            | 48.4%            | -3.462 (0.695)   | 6.28 x 10 <sup>-7</sup> | 0.82 (0)         | 16452 |
| rs214054   | 6   | 25667877 | LRRRC16A | intron | A            | 52.9%            | 3.353 (0.697)    | 1.51 x 10 <sup>-6</sup> | 0.76 (0)         | 16452 |
| rs12177652 | 6   | 33586740 |          |        | T            | 76.8%            | -4.191 (0.842)   | 6.38 x 10 <sup>-7</sup> | 0.08 (28.6)      | 16448 |
| rs210176   | 6   | 33591894 |          |        | A            | 60.8%            | -3.759 (0.723)   | 2.02 x 10 <sup>-7</sup> | 0.02 (46.5)      | 16452 |
| rs210179   | 6   | 33593214 |          |        | T            | 70.6%            | 4.621 (0.807)    | 1.03 x 10 <sup>-8</sup> | 0.04 (39.2)      | 16445 |
| rs210180   | 6   | 33593237 |          |        | A            | 53.3%            | 3.666 (0.701)    | 1.73 x 10 <sup>-7</sup> | 0.03 (42.3)      | 16452 |
| rs210188   | 6   | 33599265 |          |        | C            | 36.1%            | -4.101 (0.748)   | 4.22 x 10 <sup>-8</sup> | 0.04 (40.9)      | 16452 |
| rs449242   | 6   | 33604692 |          |        | T            | 36.9%            | -4.408 (0.737)   | 2.26 x 10 <sup>-9</sup> | 0.03 (43.6)      | 16452 |

|                  |   |          |      |             |   |       |                |                        |             |       |
|------------------|---|----------|------|-------------|---|-------|----------------|------------------------|-------------|-------|
| <b>rs9469481</b> | 6 | 33613572 |      |             | A | 55.1% | 3.586 (0.701)  | $3.15 \times 10^{-7}$  | 0.03 (44.6) | 16452 |
| <b>rs380163</b>  | 6 | 33613666 |      |             | A | 44.5% | -3.583 (0.701) | $3.23 \times 10^{-7}$  | 0.02 (44.7) | 16452 |
| <b>rs367408</b>  | 6 | 33613724 |      |             | A | 55.5% | 3.58 (0.701)   | $3.25 \times 10^{-7}$  | 0.02 (45)   | 16452 |
| <b>rs368716</b>  | 6 | 33613959 |      |             | T | 44.9% | -3.584 (0.700) | $3.08 \times 10^{-7}$  | 0.02 (45.6) | 16452 |
| <b>rs396516</b>  | 6 | 33614045 |      |             | A | 54.9% | 3.622 (0.705)  | $2.77 \times 10^{-7}$  | 0.02 (47)   | 16256 |
| <b>rs367897</b>  | 6 | 33614220 |      |             | C | 55.5% | 3.628 (0.702)  | $2.36 \times 10^{-7}$  | 0.06 (33.5) | 16369 |
| <b>rs404778</b>  | 6 | 33614543 |      |             | T | 44.5% | -3.632 (0.701) | $2.17 \times 10^{-7}$  | 0.02 (45.4) | 16452 |
| <b>rs9469483</b> | 6 | 33615234 |      |             | C | 55.5% | 3.658 (0.701)  | $1.81 \times 10^{-7}$  | 0.02 (45.4) | 16452 |
| <b>rs210197</b>  | 6 | 33615969 |      |             | T | 52.5% | -3.543 (0.701) | $4.3 \times 10^{-7}$   | 0.76 (0)    | 16415 |
| <b>rs9469485</b> | 6 | 33622071 |      |             | T | 30.6% | 4.713 (0.787)  | $2.09 \times 10^{-9}$  | 0.18 (9.2)  | 16452 |
| <b>rs210152</b>  | 6 | 33623498 |      |             | A | 88.5% | 6.551 (1.183)  | $3.07 \times 10^{-8}$  | 0.72 (0)    | 16450 |
| <b>rs9366824</b> | 6 | 33629555 |      |             | T | 30.1% | 5.098 (0.761)  | $2.05 \times 10^{-11}$ | 0.62 (0)    | 16452 |
| <b>rs210170</b>  | 6 | 33633658 |      |             | T | 30.1% | -4.093 (0.756) | $6.2 \times 10^{-8}$   | 0.54 (0)    | 16451 |
| <b>rs210130</b>  | 6 | 33641382 |      |             | T | 41.7% | 4.632 (0.708)  | $5.91 \times 10^{-11}$ | 0.65 (0)    | 16452 |
| <b>rs6910233</b> | 6 | 33642704 |      |             | T | 57.0% | 3.769 (0.704)  | $8.57 \times 10^{-8}$  | 0.32 (0)    | 16410 |
| <b>rs6914422</b> | 6 | 33642858 |      |             | T | 29.8% | 5.116 (0.761)  | $1.74 \times 10^{-11}$ | 0.62 (0)    | 16408 |
| <b>rs210132</b>  | 6 | 33644648 |      |             | T | 42.6% | 4.786 (0.700)  | $8.11 \times 10^{-12}$ | 0.24 (0)    | 16414 |
| <b>rs210133</b>  | 6 | 33644775 |      |             | C | 35.7% | -4.733 (0.721) | $5.33 \times 10^{-11}$ | 0.39 (0)    | 16278 |
| <b>rs210134</b>  | 6 | 33648187 | BAK1 | near-gene-3 | A | 28.6% | -6.156 (0.777) | $2.32 \times 10^{-15}$ | 0.18 (10.6) | 16452 |
| <b>rs210135</b>  | 6 | 33648670 | BAK1 | intron      | A | 71.7% | 5.988 (0.784)  | $2.18 \times 10^{-14}$ | 0.31 (0)    | 16388 |

|                   |   |           |          |             |   |       |                |                        |              |       |
|-------------------|---|-----------|----------|-------------|---|-------|----------------|------------------------|--------------|-------|
| <b>rs513349</b>   | 6 | 33649697  | BAK1     | intron      | A | 37.3% | -5.226 (0.725) | $5.69 \times 10^{-13}$ | 0.23 (2)     | 16451 |
| <b>rs9296095</b>  | 6 | 33650501  | BAK1     | intron      | T | 71.3% | -5.429 (0.772) | $2.03 \times 10^{-12}$ | 0.41 (0)     | 16417 |
| <b>rs210139</b>   | 6 | 33651387  | BAK1     | intron      | A | 53.0% | -4.985 (0.691) | $5.44 \times 10^{-13}$ | 0.17 (10.9)  | 16411 |
| <b>rs5745582</b>  | 6 | 33654476  | BAK1     | intron      | T | 28.7% | 5.397 (0.770)  | $2.48 \times 10^{-12}$ | 0.47 (0)     | 16450 |
| <b>rs210142</b>   | 6 | 33654815  | BAK1     | intron      | T | 26.0% | -5.010 (0.818) | $8.32 \times 10^{-10}$ | 0.002 (61.2) | 16452 |
| <b>rs530878</b>   | 6 | 33659492  | GGNBP1   | near-gene-5 | A | 47.7% | -4.569 (0.724) | $2.72 \times 10^{-10}$ | 0.24 (0.2)   | 16452 |
| <b>rs6900408</b>  | 6 | 33660142  | GGNBP1   | near-gene-3 | T | 42.8% | 4.562 (0.716)  | $1.86 \times 10^{-10}$ | 0.19 (7.7)   | 16452 |
| <b>rs549888</b>   | 6 | 33660180  | FLJ43752 | intron      | A | 36.2% | -5.549 (0.736) | $4.7 \times 10^{-14}$  | 0.12 (21.5)  | 16452 |
| <b>rs7772031</b>  | 6 | 135301427 | ALDH8A1  | intron      | A | 55.2% | 3.197 (0.714)  | $7.49 \times 10^{-6}$  | 0.21 (4.5)   | 16452 |
| <b>rs13220662</b> | 6 | 135437241 |          |             | A | 58.4% | -4.156 (0.762) | $5.01 \times 10^{-8}$  | 0.17 (11.7)  | 16444 |
| <b>rs7775698</b>  | 6 | 135460328 |          |             | T | 21.1% | 4.008 (0.901)  | $8.68 \times 10^{-6}$  | 0.55 (0)     | 16452 |
| <b>rs4895441</b>  | 6 | 135468266 |          |             | A | 90.2% | -5.795 (1.166) | $6.72 \times 10^{-7}$  | 1 (0)        | 16415 |
| <b>rs9376092</b>  | 6 | 135468837 |          |             | A | 19.6% | 4.242 (0.868)  | $1.03 \times 10^{-6}$  | 0.55 (0)     | 16410 |
| <b>rs9389269</b>  | 6 | 135468852 |          |             | T | 91.9% | -7.040 (1.267) | $2.66 \times 10^{-8}$  | 0.98 (0)     | 16452 |
| <b>rs9402686</b>  | 6 | 135469510 |          |             | A | 8.1%  | 7.236 (1.312)  | $3.51 \times 10^{-8}$  | 0.99 (0)     | 16452 |
| <b>rs9494145</b>  | 6 | 135474245 |          |             | T | 92.7% | -8.187 (1.377) | $2.79 \times 10^{-9}$  | 0.99 (0)     | 16449 |
| <b>rs9483788</b>  | 6 | 135477194 |          |             | T | 92.3% | -7.584 (1.298) | $5.21 \times 10^{-9}$  | 1 (0)        | 16452 |
| <b>rs6961069</b>  | 7 | 80056897  |          |             | T | 51.1% | 3.439 (0.690)  | $8.89 \times 10^{-7}$  | 0.61 (0)     | 16452 |
| <b>rs1194182</b>  | 7 | 80069440  | CD36     | near-gene-5 | C | 67.1% | 3.926 (0.752)  | $1.79 \times 10^{-7}$  | 0.61 (0)     | 16452 |
| <b>rs17154155</b> | 7 | 80072179  | CD36     | intron      | T | 45.4% | 4.031 (0.705)  | $1.1 \times 10^{-8}$   | 0.81 (0)     | 16452 |

|                   |    |           |      |        |   |       |                |                       |              |       |
|-------------------|----|-----------|------|--------|---|-------|----------------|-----------------------|--------------|-------|
| <b>rs13236689</b> | 7  | 80073950  | CD36 | intron | T | 56.4% | -4.181 (0.704) | $2.84 \times 10^{-9}$ | 0.73 (0)     | 16443 |
| <b>rs1761661</b>  | 7  | 80075977  | CD36 | intron | A | 33.5% | -3.606 (0.738) | $1.02 \times 10^{-6}$ | 0.68 (0)     | 16452 |
| <b>rs1722505</b>  | 7  | 80078625  | CD36 | intron | T | 33.5% | -3.319 (0.730) | $7.24 \times 10^{-6}$ | 0.54 (0)     | 16452 |
| <b>rs1722502</b>  | 7  | 80079810  | CD36 | intron | A | 33.5% | -3.471 (0.746) | $3.24 \times 10^{-6}$ | 0.55 (0)     | 16452 |
| <b>rs4731643</b>  | 7  | 80085965  | CD36 | intron | A | 36.7% | -3.457 (0.755) | $4.74 \times 10^{-6}$ | 0.23 (0)     | 14615 |
| <b>rs3211913</b>  | 7  | 80132540  | CD36 | intron | A | 66.9% | 3.890 (0.862)  | $6.47 \times 10^{-6}$ | 0.01 (56.8)  | 16452 |
| <b>rs17154246</b> | 7  | 80133170  | CD36 | intron | A | 24.3% | -4.297 (0.909) | $2.27 \times 10^{-6}$ | 0.13 (19.2)  | 16452 |
| <b>rs342292</b>   | 7  | 106157880 |      |        | C | 66.6% | 3.604 (0.755)  | $1.83 \times 10^{-6}$ | 0.27 (0)     | 16452 |
| <b>rs342293</b>   | 7  | 106159455 |      |        | C | 61.4% | 4.055 (0.717)  | $1.58 \times 10^{-8}$ | 0.19 (9)     | 16411 |
| <b>rs342294</b>   | 7  | 106159858 |      |        | T | 61.4% | 3.841 (0.861)  | $8.19 \times 10^{-6}$ | 0.35 (0)     | 11068 |
| <b>rs342295</b>   | 7  | 106159996 |      |        | T | 37.7% | -4.077 (0.746) | $4.21 \times 10^{-8}$ | 0.21 (5.3)   | 16452 |
| <b>rs342296</b>   | 7  | 106160139 |      |        | A | 37.6% | -4.104 (0.738) | $2.68 \times 10^{-8}$ | 0.2 (6.1)    | 16451 |
| <b>rs342298</b>   | 7  | 106160882 |      |        | T | 37.3% | -4.156 (0.752) | $3.31 \times 10^{-8}$ | 0.27 (0)     | 16452 |
| <b>rs10761703</b> | 10 | 64532968  |      |        | A | 45.1% | 3.960 (0.711)  | $2.34 \times 10^{-8}$ | 0.77 (0)     | 16452 |
| <b>rs10822133</b> | 10 | 64535878  |      |        | A | 30.6% | 3.642 (0.762)  | $1.73 \times 10^{-6}$ | 0.003 (59.6) | 16452 |
| <b>rs10761708</b> | 10 | 64538046  |      |        | A | 55.3% | 3.391 (0.717)  | $2.23 \times 10^{-6}$ | 0.63 (0)     | 16452 |
| <b>rs10995441</b> | 10 | 64539245  |      |        | T | 54.8% | 3.568 (0.707)  | $4.44 \times 10^{-7}$ | 0.67 (0)     | 16452 |
| <b>rs10761711</b> | 10 | 64539948  |      |        | A | 50.5% | -3.633 (0.700) | $2.13 \times 10^{-7}$ | 0.67 (0)     | 16415 |
| <b>rs4414112</b>  | 10 | 64545552  |      |        | A | 58.6% | -4.172 (0.741) | $1.77 \times 10^{-8}$ | 0.16 (14.2)  | 16445 |
| <b>rs7901794</b>  | 10 | 64547944  |      |        | T | 54.5% | 3.380 (0.759)  | $7.98 \times 10^{-6}$ | 0.19 (8.4)   | 16452 |

|                   |    |          |        |           |   |       |                |                        |               |       |
|-------------------|----|----------|--------|-----------|---|-------|----------------|------------------------|---------------|-------|
| <b>rs1396964</b>  | 10 | 64548304 |        |           | A | 39.7% | 4.271 (0.729)  | $4.74 \times 10^{-9}$  | 0.13 (19.2)   | 16452 |
| <b>rs1553789</b>  | 10 | 64549235 |        |           | T | 36.6% | 4.431 (0.728)  | $1.13 \times 10^{-9}$  | 0.31 (0)      | 16395 |
| <b>rs7082200</b>  | 10 | 64558327 |        |           | C | 59.3% | -4.375 (0.725) | $1.58 \times 10^{-9}$  | 0.29 (0)      | 16452 |
| <b>rs10995450</b> | 10 | 64558917 |        |           | T | 59.5% | -4.653 (0.715) | $7.47 \times 10^{-11}$ | 0.32 (0)      | 16414 |
| <b>rs871690</b>   | 10 | 64564065 | NRBF2  | intron    | A | 59.5% | -4.642 (0.714) | $8.12 \times 10^{-11}$ | 0.32 (0)      | 16451 |
| <b>rs7073746</b>  | 10 | 64574077 | NRBF2  | intron    | A | 66.3% | -5.091 (0.731) | $3.41 \times 10^{-12}$ | 0.05 (35.1)   | 16452 |
| <b>rs10733787</b> | 10 | 64576844 | NRBF2  | intron    | A | 41.9% | 3.662 (0.712)  | $2.71 \times 10^{-7}$  | 0.001 (64.5)  | 16452 |
| <b>rs1009984</b>  | 10 | 64586475 |        |           | T | 44.9% | -3.181 (0.702) | $5.87 \times 10^{-6}$  | 0.56 (0)      | 16414 |
| <b>rs10733788</b> | 10 | 64587871 |        |           | T | 58.3% | -4.397 (0.711) | $6.31 \times 10^{-10}$ | 0.26 (0)      | 16452 |
| <b>rs1935</b>     | 10 | 64597829 | JMJD1C | missense  | C | 64.5% | -4.071 (0.732) | $2.66 \times 10^{-8}$  | 0.0002 (70.1) | 16452 |
| <b>rs907</b>      | 10 | 64606685 | JMJD1C | intron    | A | 51.3% | -3.654 (0.699) | $1.76 \times 10^{-7}$  | 0.08 (30.2)   | 16405 |
| <b>rs2306263</b>  | 10 | 64607421 | JMJD1C | intron    | T | 38.7% | -3.212 (0.724) | $9.08 \times 10^{-6}$  | 0.03 (41.3)   | 16452 |
| <b>rs3211105</b>  | 10 | 64615370 | JMJD1C | reference | A | 41.6% | 4.304 (0.712)  | $1.48 \times 10^{-9}$  | 0.27 (0)      | 16451 |
| <b>rs10465990</b> | 10 | 64630542 | JMJD1C | intron    | A | 39.6% | 4.534 (0.716)  | $2.48 \times 10^{-10}$ | 0.43 (0)      | 16452 |
| <b>rs4379723</b>  | 10 | 64633455 | JMJD1C | intron    | T | 66.5% | -4.936 (0.731) | $1.5 \times 10^{-11}$  | 0.1 (25.7)    | 16452 |
| <b>rs1579045</b>  | 10 | 64640454 | JMJD1C | intron    | A | 41.6% | 4.359 (0.712)  | $9.17 \times 10^{-10}$ | 0.23 (1.8)    | 16448 |
| <b>rs7920159</b>  | 10 | 64642182 | JMJD1C | intron    | C | 58.3% | -4.315 (0.712) | $1.37 \times 10^{-9}$  | 0.29 (0)      | 16452 |
| <b>rs10761725</b> | 10 | 64644543 | JMJD1C | missense  | A | 60.4% | -4.487 (0.717) | $3.81 \times 10^{-10}$ | 0.52 (0)      | 16425 |
| <b>rs10822148</b> | 10 | 64649253 | JMJD1C | intron    | A | 58.3% | -4.158 (0.726) | $9.96 \times 10^{-9}$  | 0.43 (0)      | 16452 |
| <b>rs4335432</b>  | 10 | 64655823 | JMJD1C | intron    | T | 39.6% | 4.540 (0.717)  | $2.36 \times 10^{-10}$ | 0.46 (0)      | 16452 |

|                   |    |          |        |        |   |       |                |                        |              |       |
|-------------------|----|----------|--------|--------|---|-------|----------------|------------------------|--------------|-------|
| <b>rs6479889</b>  | 10 | 64658633 | JMJD1C | intron | A | 39.6% | 4.538 (0.716)  | $2.41 \times 10^{-10}$ | 0.46 (0)     | 16440 |
| <b>rs10761728</b> | 10 | 64665574 | JMJD1C | intron | T | 41.7% | 4.240 (0.712)  | $2.62 \times 10^{-9}$  | 0.41 (0)     | 16452 |
| <b>rs7082066</b>  | 10 | 64668977 | JMJD1C | intron | A | 51.0% | -3.892 (0.761) | $3.19 \times 10^{-7}$  | 0.06 (31.5)  | 13729 |
| <b>rs7081614</b>  | 10 | 64681854 | JMJD1C | intron | T | 41.4% | 4.304 (0.712)  | $1.48 \times 10^{-9}$  | 0.33 (0)     | 16446 |
| <b>rs10822150</b> | 10 | 64687502 | JMJD1C | intron | A | 42.0% | 4.374 (0.715)  | $9.38 \times 10^{-10}$ | 0.33 (0)     | 16452 |
| <b>rs10761731</b> | 10 | 64697616 | JMJD1C | intron | A | 67.6% | -4.957 (0.749) | $3.66 \times 10^{-11}$ | 0.25 (0)     | 16452 |
| <b>rs7909555</b>  | 10 | 64703114 | JMJD1C | intron | T | 58.4% | -4.392 (0.712) | $6.96 \times 10^{-10}$ | 0.28 (0)     | 16452 |
| <b>rs10761733</b> | 10 | 64704790 | JMJD1C | intron | T | 58.2% | -4.388 (0.712) | $7.3 \times 10^{-10}$  | 0.29 (0)     | 16452 |
| <b>rs4417159</b>  | 10 | 64715704 | JMJD1C | intron | A | 41.8% | 4.109 (0.723)  | $1.31 \times 10^{-8}$  | 0.48 (0)     | 16452 |
| <b>rs7477138</b>  | 10 | 64716674 | JMJD1C | intron | A | 43.4% | -3.881 (0.714) | $5.39 \times 10^{-8}$  | 0.03 (43.1)  | 16452 |
| <b>rs10995493</b> | 10 | 64717032 | JMJD1C | intron | T | 41.8% | 4.231 (0.713)  | $2.96 \times 10^{-9}$  | 0.47 (0)     | 16452 |
| <b>rs7080386</b>  | 10 | 64718312 | JMJD1C | intron | A | 32.5% | 4.896 (0.752)  | $7.62 \times 10^{-11}$ | 0.27 (0)     | 16452 |
| <b>rs7075195</b>  | 10 | 64720665 | JMJD1C | intron | A | 67.6% | -5.134 (0.738) | $3.4 \times 10^{-12}$  | 0.15 (14.5)  | 16452 |
| <b>rs7913332</b>  | 10 | 64723656 | JMJD1C | intron | A | 58.2% | -3.555 (0.713) | $6.26 \times 10^{-7}$  | 0.002 (61.3) | 16452 |
| <b>rs10761739</b> | 10 | 64732014 | JMJD1C | intron | C | 32.5% | 4.664 (0.742)  | $3.37 \times 10^{-10}$ | 0.13 (19.3)  | 16403 |
| <b>rs10761741</b> | 10 | 64736192 | JMJD1C | intron | T | 32.3% | 5.106 (0.737)  | $4.34 \times 10^{-12}$ | 0.16 (12.8)  | 16407 |
| <b>rs7070296</b>  | 10 | 64740444 | JMJD1C | intron | A | 35.0% | 4.820 (0.735)  | $5.56 \times 10^{-11}$ | 0.09 (26.4)  | 16452 |
| <b>rs10400028</b> | 10 | 64744349 | JMJD1C | intron | A | 61.4% | 3.254 (0.723)  | $6.78 \times 10^{-6}$  | 0.03 (43.9)  | 16452 |
| <b>rs10995499</b> | 10 | 64744907 | JMJD1C | intron | A | 38.3% | -3.221 (0.728) | $9.64 \times 10^{-6}$  | 0.03 (42.5)  | 16343 |
| <b>rs7088045</b>  | 10 | 64749403 | JMJD1C | intron | A | 38.7% | 4.653 (0.718)  | $9.36 \times 10^{-11}$ | 0.61 (0)     | 16452 |

|                   |    |          |        |        |   |       |                |                        |              |       |
|-------------------|----|----------|--------|--------|---|-------|----------------|------------------------|--------------|-------|
| <b>rs10761742</b> | 10 | 64755054 | JMJD1C | intron | A | 66.4% | -4.053 (0.731) | $2.9 \times 10^{-8}$   | 0.001 (65)   | 16452 |
| <b>rs10995505</b> | 10 | 64761165 | JMJD1C | intron | A | 60.3% | -4.223 (0.728) | $6.68 \times 10^{-9}$  | 0.43 (0)     | 16414 |
| <b>rs10740118</b> | 10 | 64771213 | JMJD1C | intron | C | 32.3% | 4.746 (0.751)  | $2.57 \times 10^{-10}$ | 0.12 (20.8)  | 16415 |
| <b>rs7896518</b>  | 10 | 64774506 | JMJD1C | intron | A | 67.6% | -5.178 (0.738) | $2.26 \times 10^{-12}$ | 0.14 (16.4)  | 16452 |
| <b>rs10761746</b> | 10 | 64774900 | JMJD1C | intron | A | 58.3% | -3.605 (0.714) | $4.39 \times 10^{-7}$  | 0.002 (61.3) | 16452 |
| <b>rs10761747</b> | 10 | 64778162 | JMJD1C | intron | C | 39.7% | 4.572 (0.717)  | $1.82 \times 10^{-10}$ | 0.52 (0)     | 16409 |
| <b>rs7098614</b>  | 10 | 64785433 | JMJD1C | intron | T | 39.0% | 4.442 (0.727)  | $1.02 \times 10^{-9}$  | 0.48 (0)     | 16452 |
| <b>rs7083356</b>  | 10 | 64785794 | JMJD1C | intron | A | 41.1% | 4.319 (0.715)  | $1.55 \times 10^{-9}$  | 0.36 (0)     | 16452 |
| <b>rs7900050</b>  | 10 | 64787776 | JMJD1C | intron | A | 38.4% | -3.307 (0.723) | $4.82 \times 10^{-6}$  | 0.02 (45)    | 16452 |
| <b>rs12355784</b> | 10 | 64791571 | JMJD1C | intron | A | 33.7% | 4.141 (0.732)  | $1.54 \times 10^{-8}$  | 0.004 (58.8) | 16392 |
| <b>rs9629895</b>  | 10 | 64792793 | JMJD1C | intron | A | 59.1% | -4.674 (0.716) | $6.48 \times 10^{-11}$ | 0.4 (0)      | 16383 |
| <b>rs10822163</b> | 10 | 64794104 | JMJD1C | intron | C | 66.3% | -4.110 (0.738) | $2.41 \times 10^{-8}$  | 0.001 (63.1) | 16452 |
| <b>rs12256924</b> | 10 | 64796074 | JMJD1C | intron | A | 38.7% | -3.258 (0.723) | $6.67 \times 10^{-6}$  | 0.03 (41.6)  | 16451 |
| <b>rs6479896</b>  | 10 | 64796838 | JMJD1C | intron | T | 66.4% | -4.156 (0.731) | $1.32 \times 10^{-8}$  | 0.003 (59.7) | 16452 |
| <b>rs7909692</b>  | 10 | 64798283 | JMJD1C | intron | A | 41.6% | 3.599 (0.714)  | $4.57 \times 10^{-7}$  | 0.003 (59.7) | 16452 |
| <b>rs7923609</b>  | 10 | 64803828 | JMJD1C | intron | A | 66.5% | -4.911 (0.732) | $1.94 \times 10^{-11}$ | 0.13 (18.4)  | 16451 |
| <b>rs2893919</b>  | 10 | 64804784 | JMJD1C | intron | A | 33.5% | 4.944 (0.733)  | $1.58 \times 10^{-11}$ | 0.13 (19.4)  | 16452 |
| <b>rs2393966</b>  | 10 | 64804820 | JMJD1C | intron | T | 66.5% | -4.944 (0.733) | $1.58 \times 10^{-11}$ | 0.13 (19.4)  | 16452 |
| <b>rs7076310</b>  | 10 | 64805678 | JMJD1C | intron | A | 33.5% | 4.946 (0.734)  | $1.58 \times 10^{-11}$ | 0.13 (19.4)  | 16452 |
| <b>rs6479897</b>  | 10 | 64806634 | JMJD1C | intron | T | 41.5% | 3.644 (0.716)  | $3.53 \times 10^{-7}$  | 0.004 (58.8) | 16452 |

|                   |    |          |        |        |   |       |                |                        |              |       |
|-------------------|----|----------|--------|--------|---|-------|----------------|------------------------|--------------|-------|
| <b>rs7910927</b>  | 10 | 64808916 | JMJD1C | intron | T | 66.5% | -4.736 (0.746) | $2.16 \times 10^{-10}$ | 0.21 (5.2)   | 16452 |
| <b>rs2393969</b>  | 10 | 64810446 | JMJD1C | intron | A | 66.6% | -4.284 (0.734) | $5.22 \times 10^{-9}$  | 0.01 (56)    | 16412 |
| <b>rs10822165</b> | 10 | 64816965 | JMJD1C | intron | T | 59.6% | -3.477 (0.729) | $1.85 \times 10^{-6}$  | 0.01 (56.6)  | 16452 |
| <b>rs7095571</b>  | 10 | 64820965 | JMJD1C | intron | T | 67.7% | -4.043 (0.749) | $6.79 \times 10^{-8}$  | 0.003 (60.3) | 16452 |
| <b>rs10761752</b> | 10 | 64830327 | JMJD1C | intron | T | 67.8% | -4.116 (0.750) | $4.1 \times 10^{-8}$   | 0.01 (55.9)  | 16452 |
| <b>rs7912893</b>  | 10 | 64832006 | JMJD1C | intron | A | 32.1% | 4.759 (0.752)  | $2.47 \times 10^{-10}$ | 0.09 (27.4)  | 16452 |
| <b>rs7896783</b>  | 10 | 64832159 | JMJD1C | intron | A | 32.1% | 4.753 (0.752)  | $2.58 \times 10^{-10}$ | 0.09 (27.4)  | 16452 |
| <b>rs10740123</b> | 10 | 64834521 | JMJD1C | intron | A | 60.0% | -4.123 (0.728) | $1.51 \times 10^{-8}$  | 0.36 (0)     | 16452 |
| <b>rs10761756</b> | 10 | 64842334 | JMJD1C | intron | T | 32.1% | 4.010 (0.751)  | $8.59 \times 10^{-8}$  | 0.002 (60.8) | 16452 |
| <b>rs6479901</b>  | 10 | 64850782 | JMJD1C | intron | A | 40.0% | 3.855 (0.742)  | $2.03 \times 10^{-7}$  | 0.31 (0)     | 16452 |
| <b>rs7923544</b>  | 10 | 64852262 | JMJD1C | intron | T | 68.1% | -3.983 (0.752) | $1.16 \times 10^{-7}$  | 0.002 (61.1) | 16452 |
| <b>rs10761762</b> | 10 | 64854723 | JMJD1C | intron | T | 68.1% | -4.377 (0.760) | $8.49 \times 10^{-9}$  | 0.08 (30)    | 16452 |
| <b>rs10740124</b> | 10 | 64855800 | JMJD1C | intron | T | 39.7% | 3.369 (0.732)  | $4.22 \times 10^{-6}$  | 0.01 (55.2)  | 16452 |
| <b>rs10761766</b> | 10 | 64860333 | JMJD1C | intron | A | 31.6% | 4.441 (0.767)  | $6.95 \times 10^{-9}$  | 0.1 (24.7)   | 16452 |
| <b>rs3740331</b>  | 10 | 64862294 | JMJD1C | intron | A | 31.5% | 4.627 (0.754)  | $8.53 \times 10^{-10}$ | 0.07 (32)    | 16452 |
| <b>rs10761767</b> | 10 | 64862437 | JMJD1C | intron | T | 60.5% | -3.873 (0.729) | $1.09 \times 10^{-7}$  | 0.38 (0)     | 16452 |
| <b>rs10761768</b> | 10 | 64864135 | JMJD1C | intron | A | 39.3% | 3.899 (0.729)  | $8.75 \times 10^{-8}$  | 0.33 (0)     | 16452 |
| <b>rs3999089</b>  | 10 | 64873814 | JMJD1C | intron | A | 70.4% | -3.673 (0.776) | $2.23 \times 10^{-6}$  | 0.06 (35)    | 16412 |
| <b>rs10509186</b> | 10 | 64877024 | JMJD1C | intron | T | 31.1% | 4.533 (0.752)  | $1.7 \times 10^{-9}$   | 0.06 (33.5)  | 16452 |
| <b>rs7085621</b>  | 10 | 64878932 | JMJD1C | intron | T | 68.8% | -4.526 (0.753) | $1.82 \times 10^{-9}$  | 0.06 (33.3)  | 16452 |



|                   |    |          |              |        |   |       |                |                       |              |       |
|-------------------|----|----------|--------------|--------|---|-------|----------------|-----------------------|--------------|-------|
| <b>rs10740125</b> | 10 | 64879615 | JMJD1C       | intron | T | 68.8% | -3.852 (0.751) | $2.9 \times 10^{-7}$  | 0.005 (57.2) | 16452 |
| <b>rs10740126</b> | 10 | 64880941 | JMJD1C       | intron | A | 68.8% | -4.524 (0.753) | $1.86 \times 10^{-9}$ | 0.06 (33.1)  | 16452 |
| <b>rs7092784</b>  | 10 | 64884755 | JMJD1C       | intron | T | 31.3% | 3.846 (0.751)  | $3.03 \times 10^{-7}$ | 0.005 (57.1) | 16452 |
| <b>rs7074735</b>  | 10 | 64889285 | JMJD1C       | intron | A | 39.5% | 3.574 (0.740)  | $1.38 \times 10^{-6}$ | 0.29 (0)     | 16452 |
| <b>rs7075205</b>  | 10 | 64889600 | JMJD1C       | intron | T | 61.0% | -3.797 (0.735) | $2.36 \times 10^{-7}$ | 0.29 (0)     | 16452 |
| <b>rs10995540</b> | 10 | 64889936 | JMJD1C       | intron | C | 60.5% | -3.772 (0.728) | $2.24 \times 10^{-7}$ | 0.32 (0)     | 16452 |
| <b>rs10159609</b> | 10 | 64890934 | JMJD1C       | intron | T | 39.5% | 3.799 (0.728)  | $1.79 \times 10^{-7}$ | 0.3 (0)      | 16452 |
| <b>rs10761771</b> | 10 | 64900170 | LOC100128604 | intron | T | 68.0% | -3.747 (0.756) | $7.14 \times 10^{-7}$ | 0.002 (61.4) | 16452 |
| <b>rs10995541</b> | 10 | 64903341 | LOC100128604 | intron | T | 39.4% | 3.769 (0.728)  | $2.24 \times 10^{-7}$ | 0.33 (0)     | 16415 |
| <b>rs7909960</b>  | 10 | 64909183 | LOC100128604 | intron | A | 31.3% | 4.302 (0.764)  | $1.78 \times 10^{-8}$ | 0.1 (25.6)   | 16452 |
| <b>rs2393978</b>  | 10 | 64911816 | LOC100128604 | intron | A | 39.4% | 3.727 (0.738)  | $4.49 \times 10^{-7}$ | 0.32 (0)     | 16452 |
| <b>rs7915779</b>  | 10 | 64914250 | LOC100128604 | intron | C | 31.2% | 3.779 (0.751)  | $4.88 \times 10^{-7}$ | 0.002 (61.3) | 16452 |
| <b>rs7085862</b>  | 10 | 64916453 | LOC100128604 | intron | T | 60.6% | -3.720 (0.727) | $3.07 \times 10^{-7}$ | 0.35 (0)     | 16452 |
| <b>rs2393977</b>  | 10 | 64917615 | LOC100128604 | intron | A | 68.8% | -3.855 (0.751) | $2.84 \times 10^{-7}$ | 0.01 (55.3)  | 16452 |
| <b>rs10740129</b> | 10 | 64920814 | LOC100128604 | intron | A | 29.5% | 4.161 (0.788)  | $1.28 \times 10^{-7}$ | 0.05 (37.5)  | 16452 |
| <b>rs7910662</b>  | 10 | 64923706 | LOC100128604 | intron | T | 39.3% | 3.787 (0.728)  | $1.96 \times 10^{-7}$ | 0.31 (0)     | 16376 |
| <b>rs10509189</b> | 10 | 64934132 | LOC100128604 | intron | T | 68.8% | -3.788 (0.751) | $4.57 \times 10^{-7}$ | 0.002 (61.3) | 16452 |
| <b>rs4486511</b>  | 10 | 64934272 | LOC100128604 | intron | T | 31.3% | 4.514 (0.752)  | $1.98 \times 10^{-9}$ | 0.06 (33.2)  | 16452 |
| <b>rs9971352</b>  | 10 | 64935114 | LOC100128604 | intron | A | 68.8% | -4.516 (0.752) | $1.94 \times 10^{-9}$ | 0.06 (33.3)  | 16452 |
| <b>rs10761779</b> | 10 | 64944933 | LOC100128604 | intron | A | 68.5% | -4.316 (0.768) | $1.89 \times 10^{-8}$ | 0.08 (28.8)  | 16249 |

|                   |    |          |              |             |   |       |                |                        |             |       |
|-------------------|----|----------|--------------|-------------|---|-------|----------------|------------------------|-------------|-------|
| <b>rs7082470</b>  | 10 | 64947032 | LOC100128604 | intron      | A | 31.0% | 4.553 (0.756)  | $1.7 \times 10^{-9}$   | 0.07 (31.4) | 16452 |
| <b>rs10822179</b> | 10 | 64950170 | REEP3        | near-gene-5 | T | 61.1% | -3.869 (0.732) | $1.26 \times 10^{-7}$  | 0.35 (0)    | 16452 |
| <b>rs10761781</b> | 10 | 64954609 | REEP3        | intron      | T | 59.1% | -3.682 (0.703) | $1.64 \times 10^{-7}$  | 0.25 (0)    | 16401 |
| <b>rs7085018</b>  | 10 | 64956673 | REEP3        | intron      | T | 68.7% | -3.877 (0.751) | $2.43 \times 10^{-7}$  | 0.002 (61)  | 16452 |
| <b>rs7920036</b>  | 10 | 64963866 | REEP3        | intron      | T | 68.6% | -4.327 (0.763) | $1.4 \times 10^{-8}$   | 0.08 (28.8) | 16452 |
| <b>rs7897379</b>  | 10 | 64971731 | REEP3        | intron      | T | 66.5% | -4.667 (0.744) | $3.61 \times 10^{-10}$ | 0.1 (23.9)  | 16452 |
| <b>rs6479905</b>  | 10 | 64985237 | REEP3        | intron      | A | 48.6% | 3.163 (0.701)  | $6.51 \times 10^{-6}$  | 0.01 (53.7) | 16452 |
| <b>rs10740134</b> | 10 | 64985439 | REEP3        | intron      | T | 67.1% | -4.579 (0.752) | $1.15 \times 10^{-9}$  | 0.14 (16.6) | 16452 |
| <b>rs7919685</b>  | 10 | 64985806 | REEP3        | intron      | T | 51.1% | -3.155 (0.709) | $8.69 \times 10^{-6}$  | 0.01 (55.8) | 16452 |
| <b>rs12247907</b> | 10 | 64987051 | REEP3        | intron      | C | 51.5% | -3.180 (0.701) | $5.76 \times 10^{-6}$  | 0.01 (53.6) | 16452 |
| <b>rs7070761</b>  | 10 | 64987062 | REEP3        | intron      | A | 48.5% | 3.184 (0.701)  | $5.57 \times 10^{-6}$  | 0.01 (53.6) | 16452 |
| <b>rs10761785</b> | 10 | 64988772 | REEP3        | intron      | T | 42.4% | 3.584 (0.710)  | $6.39 \times 10^{-7}$  | 0.02 (46.5) | 16452 |
| <b>rs2393986</b>  | 10 | 64990012 | REEP3        | intron      | A | 67.0% | -4.526 (0.753) | $1.87 \times 10^{-9}$  | 0.17 (12.3) | 16452 |
| <b>rs7899657</b>  | 10 | 64993271 | REEP3        | intron      | A | 50.9% | -3.255 (0.705) | $3.9 \times 10^{-6}$   | 0.01 (53.7) | 16452 |
| <b>rs10733793</b> | 10 | 64993815 | REEP3        | intron      | T | 66.3% | -4.573 (0.752) | $1.2 \times 10^{-9}$   | 0.19 (9.1)  | 16452 |
| <b>rs4746203</b>  | 10 | 64994003 | REEP3        | intron      | T | 50.8% | -3.197 (0.704) | $5.68 \times 10^{-6}$  | 0.01 (52.3) | 16451 |
| <b>rs10822182</b> | 10 | 64995484 | REEP3        | intron      | A | 33.8% | 4.602 (0.750)  | $8.7 \times 10^{-10}$  | 0.2 (7)     | 16452 |
| <b>rs3847326</b>  | 10 | 65001865 | REEP3        | intron      | A | 48.8% | 3.199 (0.701)  | $5.04 \times 10^{-6}$  | 0.02 (48.8) | 16452 |
| <b>rs10761786</b> | 10 | 65006213 | REEP3        | intron      | T | 59.9% | -3.715 (0.720) | $2.51 \times 10^{-7}$  | 0.55 (0)    | 16452 |
| <b>rs10822186</b> | 10 | 65020389 | REEP3        | intron      | A | 59.8% | -3.741 (0.722) | $2.24 \times 10^{-7}$  | 0.47 (0)    | 16452 |

|                   |    |          |         |                   |   |       |                |                       |             |       |
|-------------------|----|----------|---------|-------------------|---|-------|----------------|-----------------------|-------------|-------|
| <b>rs10761787</b> | 10 | 65023761 | REEP3   | intron            | A | 57.7% | -3.511 (0.724) | $1.23 \times 10^{-6}$ | 0.43 (0)    | 16452 |
| <b>rs10897445</b> | 11 | 63253388 | RTN3    | intron            | T | 91.5% | -5.849 (1.269) | $4.01 \times 10^{-6}$ | 0.72 (0)    | 16403 |
| <b>rs627055</b>   | 11 | 63645869 | MACROD1 | intron            | T | 14.1% | 4.929 (1.015)  | $1.2 \times 10^{-6}$  | 0.49 (0)    | 16412 |
| <b>rs1123251</b>  | 11 | 63674177 | MACROD1 | intron            | T | 9.7%  | 6.181 (1.223)  | $4.35 \times 10^{-7}$ | 1 (0)       | 16407 |
| <b>rs4980525</b>  | 11 | 63704930 |         |                   | A | 14.6% | 4.716 (1.027)  | $4.42 \times 10^{-6}$ | 0.51 (0)    | 16452 |
| <b>rs2244625</b>  | 11 | 63782720 | PLCB3   | coding-synonymous | A | 27.3% | 4.221 (0.885)  | $1.87 \times 10^{-6}$ | 0.15 (15.4) | 16452 |
| <b>rs3815362</b>  | 11 | 63790131 | PLCB3   | intron            | T | 9.0%  | 6.209 (1.396)  | $8.72 \times 10^{-6}$ | 0.58 (0)    | 16450 |
| <b>rs1317494</b>  | 11 | 63793264 | BAD     | near-gene-3       | C | 92.2% | -6.702 (1.454) | $4.01 \times 10^{-6}$ | 0.53 (0)    | 16452 |
| <b>rs11231741</b> | 11 | 63803461 | BAD     | intron            | T | 6.5%  | 7.392 (1.467)  | $4.65 \times 10^{-7}$ | 0.71 (0)    | 15495 |
| <b>rs477895</b>   | 11 | 63805488 | BAD     | intron            | T | 54.7% | 4.180 (0.768)  | $4.91 \times 10^{-8}$ | 0.17 (11.4) | 16452 |
| <b>rs2232410</b>  | 11 | 63815398 | KCNK4   | utr-5             | A | 42.5% | -5.685 (1.107) | $2.81 \times 10^{-7}$ | 0.2 (4.7)   | 8389  |
| <b>rs493052</b>   | 11 | 63834956 | ESRRA   | intron            | A | 42.3% | -5.877 (1.103) | $9.92 \times 10^{-8}$ | 0.17 (9.2)  | 8391  |
| <b>rs9787810</b>  | 11 | 63841874 | PRDX5   | near-gene-5       | T | 9.2%  | 6.059 (1.339)  | $6.04 \times 10^{-6}$ | 0.54 (0)    | 16452 |
| <b>rs558864</b>   | 11 | 63863719 | CCDC88B | near-gene-5       | T | 11.7% | -5.082 (1.074) | $2.21 \times 10^{-6}$ | 0.77 (0)    | 16411 |
| <b>rs2076853</b>  | 11 | 64035213 |         |                   | A | 22.1% | 3.924 (0.877)  | $7.61 \times 10^{-6}$ | 0.08 (29.9) | 15491 |
| <b>rs7936185</b>  | 11 | 64062028 |         |                   | T | 10.6% | 6.326 (1.202)  | $1.43 \times 10^{-7}$ | 0.58 (0)    | 16452 |
| <b>rs4930420</b>  | 11 | 64063633 |         |                   | C | 11.1% | 6.414 (1.200)  | $9.16 \times 10^{-8}$ | 0.59 (0)    | 16452 |
| <b>rs4930423</b>  | 11 | 64068473 |         |                   | T | 89.0% | -5.402 (1.135) | $1.94 \times 10^{-6}$ | 0.09 (26.3) | 16452 |
| <b>rs11231816</b> | 11 | 64068979 |         |                   | A | 10.8% | 5.431 (1.133)  | $1.63 \times 10^{-6}$ | 0.09 (26.7) | 16414 |
| <b>rs7124676</b>  | 11 | 64069867 |         |                   | A | 12.6% | 5.527 (1.086)  | $3.63 \times 10^{-7}$ | 0.17 (11.7) | 16395 |

|                   |    |           |           |        |   |       |                |                       |             |       |
|-------------------|----|-----------|-----------|--------|---|-------|----------------|-----------------------|-------------|-------|
| <b>rs4930426</b>  | 11 | 64072490  |           |        | C | 87.0% | -5.411 (1.091) | $7.11 \times 10^{-7}$ | 0.17 (12.6) | 16452 |
| <b>rs523200</b>   | 11 | 64289155  | SF1       | utr-3  | A | 23.9% | 4.186 (0.884)  | $2.19 \times 10^{-6}$ | 0.49 (0)    | 16452 |
| <b>rs680273</b>   | 11 | 64296211  | SF1       | intron | C | 23.8% | 4.145 (0.879)  | $2.4 \times 10^{-6}$  | 0.49 (0)    | 16415 |
| <b>rs650506</b>   | 11 | 64453962  | PPP2R5B   | intron | T | 73.2% | -3.943 (0.883) | $7.9 \times 10^{-6}$  | 0.16 (14)   | 16451 |
| <b>rs615709</b>   | 11 | 64466377  | LOC283129 | intron | T | 28.5% | 4.227 (0.852)  | $7.1 \times 10^{-7}$  | 0.14 (17.8) | 16452 |
| <b>rs11065884</b> | 12 | 110303084 | LOC642580 | intron | A | 28.8% | -3.681 (0.787) | $2.9 \times 10^{-6}$  | 0.97 (0)    | 16452 |
| <b>rs10849947</b> | 12 | 110349067 | SH2B3     | intron | T | 32.9% | -4.214 (0.757) | $2.55 \times 10^{-8}$ | 0.77 (0)    | 16452 |
| <b>rs11065900</b> | 12 | 110357059 | SH2B3     | intron | C | 34.6% | 4.095 (0.754)  | $5.72 \times 10^{-8}$ | 0.85 (0)    | 15450 |
| <b>rs7299305</b>  | 12 | 110358652 | SH2B3     | intron | C | 65.4% | -4.155 (0.753) | $3.42 \times 10^{-8}$ | 0.9 (0)     | 15483 |
| <b>rs7296313</b>  | 12 | 110362909 | SH2B3     | intron | T | 45.4% | -3.519 (0.708) | $6.73 \times 10^{-7}$ | 0.89 (0)    | 16452 |
| <b>rs2238154</b>  | 12 | 110366868 | SH2B3     | intron | A | 66.8% | 4.245 (0.749)  | $1.48 \times 10^{-8}$ | 0.84 (0)    | 16450 |
| <b>rs14555</b>    | 12 | 110373699 | SH2B3     | utr-3  | A | 65.2% | -4.071 (0.759) | $8.32 \times 10^{-8}$ | 0.79 (0)    | 15271 |
| <b>rs10849949</b> | 12 | 110377920 | ATXN2     | intron | A | 33.2% | -4.177 (0.750) | $2.55 \times 10^{-8}$ | 0.88 (0)    | 16385 |
| <b>rs2301622</b>  | 12 | 110379586 | ATXN2     | intron | C | 32.8% | -4.218 (0.769) | $4.11 \times 10^{-8}$ | 0.74 (0)    | 15525 |
| <b>rs11065915</b> | 12 | 110390377 | ATXN2     | intron | A | 65.9% | -4.104 (0.735) | $2.36 \times 10^{-8}$ | 0.96 (0)    | 16412 |
| <b>rs10161383</b> | 12 | 110400664 | ATXN2     | intron | T | 34.1% | 4.065 (0.735)  | $3.27 \times 10^{-8}$ | 0.96 (0)    | 16408 |
| <b>rs1029388</b>  | 12 | 110411284 | ATXN2     | intron | T | 32.7% | -4.057 (0.756) | $8.18 \times 10^{-8}$ | 0.74 (0)    | 16392 |
| <b>rs11065932</b> | 12 | 110424428 | ATXN2     | intron | A | 66.0% | -4.062 (0.736) | $3.41 \times 10^{-8}$ | 0.97 (0)    | 16404 |
| <b>rs6490162</b>  | 12 | 110425503 | ATXN2     | intron | T | 44.6% | -3.326 (0.707) | $2.54 \times 10^{-6}$ | 0.9 (0)     | 16451 |
| <b>rs628825</b>   | 12 | 110436233 | ATXN2     | intron | T | 66.4% | 4.243 (0.750)  | $1.57 \times 10^{-8}$ | 0.85 (0)    | 16452 |

|                   |    |           |       |        |   |       |                |                       |          |       |
|-------------------|----|-----------|-------|--------|---|-------|----------------|-----------------------|----------|-------|
| <b>rs630512</b>   | 12 | 110436550 | ATXN2 | intron | T | 66.4% | 4.257 (0.751)  | $1.43 \times 10^{-8}$ | 0.84 (0) | 16451 |
| <b>rs16941541</b> | 12 | 110438087 | ATXN2 | intron | A | 8.7%  | -5.837 (1.261) | $3.67 \times 10^{-6}$ | 0.66 (0) | 16452 |
| <b>rs11065936</b> | 12 | 110441414 | ATXN2 | intron | T | 33.6% | 4.007 (0.761)  | $1.42 \times 10^{-7}$ | 0.94 (0) | 15418 |
| <b>rs657197</b>   | 12 | 110450041 | ATXN2 | intron | A | 66.2% | 4.294 (0.750)  | $1.03 \times 10^{-8}$ | 0.89 (0) | 16451 |
| <b>rs607316</b>   | 12 | 110453831 | ATXN2 | intron | T | 55.2% | 3.280 (0.705)  | $3.33 \times 10^{-6}$ | 0.9 (0)  | 16452 |
| <b>rs7978331</b>  | 12 | 110455616 | ATXN2 | intron | A | 65.9% | -4.077 (0.735) | $2.93 \times 10^{-8}$ | 0.96 (0) | 16413 |
| <b>rs7136679</b>  | 12 | 110456662 | ATXN2 | intron | T | 65.9% | -4.074 (0.735) | $2.95 \times 10^{-8}$ | 0.96 (0) | 16414 |
| <b>rs7979403</b>  | 12 | 110462527 | ATXN2 | intron | C | 66.3% | -4.100 (0.821) | $5.85 \times 10^{-7}$ | 0.93 (0) | 12816 |
| <b>rs41500449</b> | 12 | 110469184 | ATXN2 | intron | T | 33.7% | 4.053 (0.802)  | $4.3 \times 10^{-7}$  | 0.84 (0) | 13733 |
| <b>rs11065951</b> | 12 | 110479861 | ATXN2 | intron | T | 33.5% | 3.947 (0.739)  | $9.43 \times 10^{-8}$ | 0.97 (0) | 16398 |
| <b>rs7308857</b>  | 12 | 110483583 | ATXN2 | intron | T | 65.4% | -4.092 (0.744) | $3.85 \times 10^{-8}$ | 0.98 (0) | 16452 |
| <b>rs616559</b>   | 12 | 110487733 | ATXN2 | intron | T | 45.2% | -3.265 (0.703) | $3.45 \times 10^{-6}$ | 0.92 (0) | 16415 |
| <b>rs616513</b>   | 12 | 110487766 | ATXN2 | intron | T | 66.1% | 4.191 (0.750)  | $2.3 \times 10^{-8}$  | 0.85 (0) | 16451 |
| <b>rs16941578</b> | 12 | 110493082 | ATXN2 | intron | T | 33.6% | 3.987 (0.736)  | $6.01 \times 10^{-8}$ | 0.98 (0) | 16408 |
| <b>rs7972340</b>  | 12 | 110493797 | ATXN2 | intron | C | 33.6% | 4.093 (0.757)  | $6.42 \times 10^{-8}$ | 0.96 (0) | 15473 |
| <b>rs12369009</b> | 12 | 110504182 | ATXN2 | intron | T | 33.8% | -4.202 (0.750) | $2.14 \times 10^{-8}$ | 0.84 (0) | 16452 |
| <b>rs695871</b>   | 12 | 110521383 | ATXN2 | intron | C | 32.4% | -4.186 (0.769) | $5.17 \times 10^{-8}$ | 0.8 (0)  | 16452 |
| <b>rs12308557</b> | 12 | 110522500 |       |        | C | 65.6% | -4.172 (0.754) | $3.18 \times 10^{-8}$ | 0.96 (0) | 15448 |
| <b>rs9300319</b>  | 12 | 110549280 |       |        | T | 33.3% | -4.262 (0.752) | $1.42 \times 10^{-8}$ | 0.71 (0) | 16452 |
| <b>rs10744773</b> | 12 | 110571193 | BRAP  | intron | A | 66.7% | 4.034 (0.755)  | $9.12 \times 10^{-8}$ | 0.64 (0) | 16452 |

|                   |    |           |          |             |   |       |                |                        |           |       |
|-------------------|----|-----------|----------|-------------|---|-------|----------------|------------------------|-----------|-------|
| <b>rs3742001</b>  | 12 | 110587531 | BRAP     | intron      | T | 66.3% | 4.347 (0.749)  | $6.58 \times 10^{-9}$  | 0.78 (0)  | 16452 |
| <b>rs7136874</b>  | 12 | 110598041 | BRAP     | intron      | T | 66.5% | 4.375 (0.749)  | $5.23 \times 10^{-9}$  | 0.79 (0)  | 16413 |
| <b>rs6490294</b>  | 12 | 110674821 | ACAD10   | intron      | A | 66.3% | 4.384 (0.749)  | $4.78 \times 10^{-9}$  | 0.71 (0)  | 16375 |
| <b>rs886205</b>   | 12 | 110688810 | ALDH2    | utr-5       | A | 33.9% | -4.373 (0.749) | $5.28 \times 10^{-9}$  | 0.69 (0)  | 16452 |
| <b>rs16941669</b> | 12 | 110730020 | ALDH2    | intron      | T | 90.9% | 5.886 (1.237)  | $1.97 \times 10^{-6}$  | 0.27 (0)  | 16452 |
| <b>rs7296651</b>  | 12 | 110731337 | ALDH2    | intron      | C | 33.4% | -4.198 (0.761) | $3.42 \times 10^{-8}$  | 0.49 (0)  | 16409 |
| <b>rs2106697</b>  | 12 | 110744448 |          |             | T | 33.8% | -4.271 (0.751) | $1.27 \times 10^{-8}$  | 0.51 (0)  | 16452 |
| <b>rs6489818</b>  | 12 | 110794963 | MAPKAPK5 | intron      | A | 66.2% | 4.256 (0.752)  | $1.51 \times 10^{-8}$  | 0.63 (0)  | 16451 |
| <b>rs3742000</b>  | 12 | 110822922 |          |             | T | 33.5% | -4.100 (0.751) | $4.82 \times 10^{-8}$  | 0.62 (0)  | 16375 |
| <b>rs11066099</b> | 12 | 110876419 | TMEM116  | intron      | C | 33.1% | -3.874 (0.751) | $2.53 \times 10^{-7}$  | 0.45 (0)  | 16452 |
| <b>rs9630276</b>  | 12 | 110889221 | TMEM116  | intron      | A | 66.6% | 4.085 (0.752)  | $5.57 \times 10^{-8}$  | 0.62 (0)  | 16451 |
| <b>rs4767264</b>  | 12 | 110910129 | TMEM116  | intron      | T | 33.2% | -4.154 (0.764) | $5.5 \times 10^{-8}$   | 0.64 (0)  | 16303 |
| <b>rs7954482</b>  | 12 | 110920399 | TMEM116  | intron      | A | 32.1% | 3.498 (0.747)  | $2.81 \times 10^{-6}$  | 0.95 (0)  | 16414 |
| <b>rs11066121</b> | 12 | 110921060 | TMEM116  | intron      | C | 31.8% | 3.486 (0.749)  | $3.27 \times 10^{-6}$  | 0.94 (0)  | 16452 |
| <b>rs16941804</b> | 12 | 110925381 | TMEM116  | intron      | T | 73.0% | -3.772 (0.788) | $1.69 \times 10^{-6}$  | 0.87 (0)  | 16443 |
| <b>rs2339941</b>  | 12 | 110975147 | C12orf30 | intron      | T | 66.1% | 3.833 (0.751)  | $3.28 \times 10^{-7}$  | 0.76 (0)  | 16450 |
| <b>rs7972112</b>  | 12 | 110989565 | C12orf30 | intron      | A | 65.5% | 3.657 (0.801)  | $5.01 \times 10^{-6}$  | 0.2 (0.7) | 14697 |
| <b>rs10850003</b> | 12 | 111055552 | TRAFD1   | intron      | A | 66.3% | 3.697 (0.750)  | $8.34 \times 10^{-7}$  | 0.76 (0)  | 16413 |
| <b>rs7297415</b>  | 12 | 111145487 | C12orf51 | intron      | A | 8.8%  | -5.847 (1.237) | $2.27 \times 10^{-6}$  | 0.44 (0)  | 16452 |
| <b>rs8109288</b>  | 19 | 16046559  | TPM4     | near-gene-5 | A | 9.7%  | -8.724 (1.403) | $5.02 \times 10^{-10}$ | 0.35 (0)  | 16452 |

|                  |    |          |       |        |   |       |                |                       |             |       |
|------------------|----|----------|-------|--------|---|-------|----------------|-----------------------|-------------|-------|
| <b>rs6070696</b> | 20 | 57031040 | TUBB1 | intron | A | 82.9% | -4.699 (0.912) | $2.55 \times 10^{-7}$ | 0.33 (0)    | 16396 |
| <b>rs151358</b>  | 20 | 57043454 | SLMO2 | utr-3  | A | 17.4% | 4.706 (0.929)  | $4.02 \times 10^{-7}$ | 0.54 (0)    | 16452 |
| <b>rs151361</b>  | 20 | 57047397 | SLMO2 | intron | A | 74.3% | -4.495 (0.783) | $9.44 \times 10^{-9}$ | 0.04 (40.1) | 16393 |

I-square = a measure of heterogeneity among studies that cannot be explained by chance; Het-P = Cochrane Q p-value to assess heterogeneity
