# Supplementary material for: A Meta-Analysis and Genome-Wide Association Study of Platelet Count and Mean Platelet Volume in African Americans
Source: PubMed Central journal article supplement (PMC3299192; doi:10.1371/journal.pgen.1002491), 2012-03-08
Supplement: pgen.1002491.s007.pdf [file pgen.1002491.s007.pdf]

**Table S3:** List of all SNPs that were significant at p-value < 10<sup>-6</sup> in regions with at least one SNP with GWAS threshold in mean platelet volume meta-analysis

| SNP        | Chr | Position  | Gene       | Role         | Coded Allele | Allele Frequency | Effect Size (SE) | P Value                  | Het-P (I-square) | N    |
|------------|-----|-----------|------------|--------------|--------------|------------------|------------------|--------------------------|------------------|------|
| rs4727659  | 7   | 106144723 |            |              | T            | 23.4%            | 0.122 (0.026)    | 2.84 x 10 <sup>-6</sup>  | 0.20 (0)         | 3901 |
| rs342293   | 7   | 106159455 |            |              | G            | 61.5%            | -0.155 (0.024)   | 5.84 x 10 <sup>-11</sup> | 0.30 (0)         | 3904 |
| Rs342294   | 7   | 106159858 |            |              | T            | 61.4%            | -0.162 (0.033)   | 7.37 x 10 <sup>-7</sup>  | 0.99 (0)         | 1989 |
| rs342295   | 7   | 106159996 |            |              | C            | 37.6%            | 0.159 (0.024)    | 3.68 x 10 <sup>-11</sup> | 0.20 (0.4)       | 3905 |
| rs342296   | 7   | 106160139 |            |              | G            | 37.2%            | 0.161 (0.024)    | 1.44 x 10 <sup>-11</sup> | 0.25 (0)         | 3904 |
| rs342298   | 7   | 106160882 |            |              | C            | 37.3%            | 0.161 (0.024)    | 3.61 x 10 <sup>-11</sup> | 0.33 (0)         | 3905 |
| rs11653144 | 17  | 24699352  | Near TAOK1 |              | C            | 55.8%            | 0.132 (0.024)    | 4.17 x 10 <sup>-8</sup>  | 0.48 (0)         | 3905 |
| rs7213208  | 17  | 24756995  |            |              | G            | 47.0%            | -0.128 (0.024)   | 1.30 x 10 <sup>-7</sup>  | 0.29 (0)         | 3905 |
| rs7208363  | 17  | 24757534  |            |              | T            | 45.9%            | -0.131 (0.026)   | 5.31 x 10 <sup>-7</sup>  | 0.18 (3.2)       | 3905 |
| rs11655000 | 17  | 24791469  |            |              | C            | 33.0%            | -0.121 (0.027)   | 6.33 x 10 <sup>-6</sup>  | 0.44 (0)         | 3905 |
| rs9900280  | 17  | 24793724  |            |              | G            | 64.3%            | 0.122 (0.025)    | 1.37 x 10 <sup>-6</sup>  | 0.53 (0)         | 3905 |
| rs12943131 | 17  | 24887832  |            |              | G            | 64.4%            | 0.124 (0.025)    | 1.04 x 10 <sup>-6</sup>  | 0.52 (0)         | 3905 |
| rs8109288  | 19  | 16046559  | TPM4       | near gene-5' | G            | 8.4%             | 0.261 (0.044)    | 3.30 x 10 <sup>-9</sup>  | 0.84 (0)         | 3905 |

I-square = a measure of heterogeneity among studies that cannot be explained by chance; Het-P = Cochran Q p-value to assess heterogeneity
