# Supplementary material for: A Meta-Analysis and Genome-Wide Association Study of Platelet Count and Mean Platelet Volume in African Americans
Source: PubMed Central journal article supplement (PMC3299192; doi:10.1371/journal.pgen.1002491), 2012-03-08
Supplement: pgen.1002491.s008.pdf [file pgen.1002491.s008.pdf]

**Table S4:** Individual study results for the top significant SNP from each region

| SNP <sup>a</sup>                | ARIC              |                        | CARDIA            |                         | GeneSTAR           |                         | HANDLS             |                         | Health ABC        |         | JHS               |                         | WHI               |                         |
|---------------------------------|-------------------|------------------------|-------------------|-------------------------|--------------------|-------------------------|--------------------|-------------------------|-------------------|---------|-------------------|-------------------------|-------------------|-------------------------|
|                                 | ES (SE)           | P-value                | ES (SE)           | P-value                 | ES (SE)            | P-value                 | ES (SE)            | P-value                 | ES (SE)           | P-value | ES (SE)           | P-value                 | ES (SE)           | P-value                 |
| <b><i>Platelet Count</i></b>    |                   |                        |                   |                         |                    |                         |                    |                         |                   |         |                   |                         |                   |                         |
| <b>rs12526480</b><br><b>G/T</b> | -4.047<br>(1.934) | 0.036                  | -5.770<br>(3.380) | 0.088                   | -8.455<br>(3.329)  | 0.011                   | -8.901<br>(3.550)  | 0.012                   | -4.962<br>(2.994) | 0.098   | -2.200<br>(2.082) | 0.291                   | -3.982<br>(1.041) | 1.31 x 10 <sup>-4</sup> |
| <b>rs210134</b><br><b>A/G</b>   | -5.842<br>(2.019) | 3.8 x 10 <sup>-3</sup> | -2.520<br>(3.500) | 0.472                   | -11.360<br>(3.437) | 9.50 x 10 <sup>-4</sup> | -9.971<br>(3.568)  | 5.20 x 10 <sup>-3</sup> | 0.261<br>(3.101)  | 0.933   | -7.171<br>(2.096) | 6.34 x 10 <sup>-4</sup> | -6.282<br>(1.050) | 2.26 x 10 <sup>-9</sup> |
| <b>rs9494145</b><br><b>C/T</b>  | 9.768<br>(3.826)  | 0.011                  | 6.730<br>(6.090)  | 0.270                   | 11.159<br>(6.161)  | 0.070                   | 7.553<br>(6.640)   | 0.255                   | 8.587<br>(5.081)  | 0.091   | 9.916<br>(3.951)  | 0.012                   | 7.353<br>(1.819)  | 5.29 x 10 <sup>-5</sup> |
| <b>rs13236689</b><br><b>G/T</b> | 3.564<br>(1.821)  | 0.050                  | 7.030<br>(3.100)  | 0.024                   | 6.194<br>(3.009)   | 0.040                   | 5.694<br>(3.193)   | 0.075                   | 0.207<br>(2.835)  | 0.942   | 4.514<br>(1.920)  | 0.019                   | 4.122<br>(0.956)  | 1.61 x 10 <sup>-5</sup> |
| <b>rs342293</b><br><b>G/C</b>   | -1.879<br>(1.831) | 0.305                  | -6.897<br>(3.170) | 0.030                   | -2.485<br>(3.462)  | 0.473                   | -10.425<br>(3.352) | 1.87 x 10 <sup>-3</sup> | -7.227<br>(2.984) | 0.016   | -1.446<br>(1.927) | 0.453                   | -4.231<br>(0.964) | 1.15 x 10 <sup>-5</sup> |
| <b>rs7896518</b><br><b>G/A</b>  | 5.959<br>(1.875)  | 1.5 x 10 <sup>-3</sup> | 12.60<br>(3.230)  | 1.03 x 10 <sup>-4</sup> | 9.535<br>(3.365)   | 4.60 x 10 <sup>-3</sup> | 5.898<br>(3.355)   | 0.079                   | 1.638<br>(3.100)  | 0.587   | 3.343<br>(2.004)  | 0.096                   | 4.587<br>(1.001)  | 4.57 x 10 <sup>-6</sup> |
| <b>rs477895</b>                 | -6.325            | 2.1 x 10 <sup>-3</sup> | 3.790             | 0.269                   | -4.630             | 0.148                   | -7.811             | 0.012                   | -5.967            | 0.040   | -5.284            | 0.011                   | -3.408            | 1.29 x 10 <sup>-3</sup> |

|                             |                   |        |                   |       |                    |                       |                    |                       |                   |       |                   |                       |                   |                       |
|-----------------------------|-------------------|--------|-------------------|-------|--------------------|-----------------------|--------------------|-----------------------|-------------------|-------|-------------------|-----------------------|-------------------|-----------------------|
| <b>C/T</b>                  | (2.058)           |        | (3.420)           |       | (3.197)            |                       | (3.097)            |                       | (2.907)           |       | (2.071)           |                       | (1.059)           |                       |
| <b>rs6490294</b>            | -4.679<br>(1.911) | 0.014  | -4.307<br>(3.381) | 0.203 | -5.880<br>(3.239)  | 0.069                 | 0.235<br>(3.432)   | 0.945                 | -3.563<br>(3.116) | 0.253 | -7.087<br>(2.066) | $6.14 \times 10^{-4}$ | -4.068<br>(1.01)  | $5.70 \times 10^{-5}$ |
| <b>C/A</b>                  |                   |        |                   |       |                    |                       |                    |                       |                   |       |                   |                       |                   |                       |
| <b>rs8109288</b>            | -8.166<br>(3.695) | 0.027  | -7.060<br>(6.990) | 0.312 | -10.111<br>(5.280) | 0.056                 | -19.783<br>(5.614) | $4.25 \times 10^{-4}$ | -4.955<br>(4.843) | 0.306 | -13.62<br>(4.038) | $7.58 \times 10^{-4}$ | -7.013<br>(1.948) | $3.16 \times 10^{-4}$ |
| <b>A/G</b>                  |                   |        |                   |       |                    |                       |                    |                       |                   |       |                   |                       |                   |                       |
| <b>rs151361</b>             | 5.233<br>(2.014)  | 0.0094 | 5.496<br>(3.490)  | 0.116 | 14.107<br>(3.294)  | $1.85 \times 10^{-5}$ | 0.224<br>(3.630)   | 0.951                 | 0.685<br>(3.249)  | 0.833 | 1.209<br>(2.117)  | 0.568                 | 4.763<br>(1.062)  | $7.34 \times 10^{-6}$ |
| <b>G/A</b>                  |                   |        |                   |       |                    |                       |                    |                       |                   |       |                   |                       |                   |                       |
| <b>Mean Platelet Volume</b> |                   |        |                   |       |                    |                       |                    |                       |                   |       |                   |                       |                   |                       |
| <b>rs342296</b>             | 0.079<br>(0.058)  | 0.176  |                   |       | 0.207<br>(0.058)   | $6.18 \times 10^{-6}$ | 0.287<br>(0.095)   | 0.0024                | 0.021<br>(0.171)  | 0.903 | 0.153<br>(0.032)  | $1.50 \times 10^{-6}$ |                   |                       |
| <b>A/G</b>                  |                   |        |                   |       |                    |                       |                    |                       |                   |       |                   |                       |                   |                       |
| <b>rs11653144</b>           | -0.148<br>(0.059) | 0.012  |                   |       | -0.090<br>(0.046)  | 0.049                 | -0.106<br>(0.094)  | 0.256                 | -0.104<br>(0.179) | 0.562 | -0.163<br>(0.032) | $5.50 \times 10^{-7}$ |                   |                       |
| <b>C/T</b>                  |                   |        |                   |       |                    |                       |                    |                       |                   |       |                   |                       |                   |                       |
| <b>rs8109288</b>            | 0.246<br>(0.093)  | 0.035  |                   |       | 0.243<br>(0.074)   | 0.0011                | 0.359<br>(0.159)   | 0.024                 | -0.001<br>(0.274) | 0.998 | 0.278<br>(0.064)  | $1.3 \times 10^{-5}$  |                   |                       |
| <b>A/G</b>                  |                   |        |                   |       |                    |                       |                    |                       |                   |       |                   |                       |                   |                       |

<sup>a</sup> minor allele always listed first; minor allele = coded/effect allele; ES = effect size
