# Supplementary material for: A Meta-Analysis and Genome-Wide Association Study of Platelet Count and Mean Platelet Volume in African Americans
Source: PubMed Central journal article supplement (PMC3299192; doi:10.1371/journal.pgen.1002491), 2012-03-08
Supplement: pgen.1002491.s009.pdf [file pgen.1002491.s009.pdf]

**Table S5:** Association analysis of rs12526480 SNP with selected phenotypes

| <b>Phenotype</b>                       | <b>Beta</b> | <b>SE</b> | <b>P-value</b> | <b>N</b> |
|----------------------------------------|-------------|-----------|----------------|----------|
| <b>Hemoglobin (g/dL)</b>               | 0.0078      | 0.0134    | 0.56           | 16480    |
| <b>Hematocrit (%)</b>                  | 0.0285      | 0.0393    | 0.47           | 16491    |
| <b>MCV (fL)</b>                        | -0.0331     | 0.0501    | 0.51           | 6422     |
| <b>RBC (million/<math>\mu</math>L)</b> | 0.0085      | 0.0109    | 0.43           | 4802     |
| <b>Ferritin (ng/mL)</b>                | 0.0154      | 0.0238    | 0.52           | 2798     |
| <b>Uric acid (mg/dL)</b>               | 0.0275      | 0.0505    | 0.59           | 936      |
