# Supplementary material for: A Meta-Analysis and Genome-Wide Association Study of Platelet Count and Mean Platelet Volume in African Americans
Source: PubMed Central journal article supplement (PMC3299192; doi:10.1371/journal.pgen.1002491), 2012-03-08
Supplement: pgen.1002491.s010.pdf [file pgen.1002491.s010.pdf]

**Table S6:** Conditional analysis of the significant SNPs in at the 11q13 locus for platelet count

| Gene            | SNP       | Beta          | SE    | P     | Beta                  | SE    | P     | Beta                   | SE    | P     | Beta                   | SE    | P     |
|-----------------|-----------|---------------|-------|-------|-----------------------|-------|-------|------------------------|-------|-------|------------------------|-------|-------|
|                 |           | no adjustment |       |       | adjusted for rs477895 |       |       | adjusted for rs4930420 |       |       | adjusted for rs2244625 |       |       |
| <b>BAD</b>      | rs477895  | 3.456         | 1.093 | 0.002 |                       |       |       | 3.024                  | 1.652 | 0.006 | 2.214                  | 1.282 | 0.084 |
| <b>SLC22A11</b> | rs4930420 | 4.719         | 1.628 | 0.004 | 3.969                 | 1.652 | 0.016 |                        |       |       | 3.598                  | 1.685 | 0.033 |
| <b>PLCB3</b>    | rs2244625 | 4.000         | 1.226 | 0.001 | 2.707                 | 1.439 | 0.070 | 3.305                  | 1.685 | 0.009 |                        |       |       |
