# Supplementary material for: A Meta-Analysis and Genome-Wide Association Study of Platelet Count and Mean Platelet Volume in African Americans
Source: PubMed Central journal article supplement (PMC3299192; doi:10.1371/journal.pgen.1002491), 2012-03-08
Supplement: pgen.1002491.s013.pdf [file pgen.1002491.s013.pdf]

**Table S9:** Percentage variance in phenotype explained by each SNP for each study

| SNP                                | ARIC  | CARDIA | GeneSTAR | HANDLS | Health ABC | JHS   | WHI   |
|------------------------------------|-------|--------|----------|--------|------------|-------|-------|
| <b><i>PLATELET COUNT</i></b>       |       |        |          |        |            |       |       |
| <b>rs12526480</b>                  | 0.16% | 0.28%  | 0.68%    | 0.57%  | 0.20%      | 0.05% | 0.19% |
| <b>rs210134</b>                    | 0.32% | 0.05%  | 1.17%    | 0.69%  | 0.00%      | 0.50% | 0.45% |
| <b>rs9494145</b>                   | 0.30% | 0.12%  | 0.38%    | 0.13%  | 0.19%      | 0.32% | 0.20% |
| <b>rs13236689</b>                  | 0.14% | 0.48%  | 0.42%    | 0.27%  | 0.00%      | 0.24% | 0.23% |
| <b>rs342293</b>                    | 0.04% | 0.44%  | 0.07%    | 0.87%  | 0.48%      | 0.02% | 0.23% |
| <b>rs7896518</b>                   | 0.36% | 1.36%  | 0.89%    | 0.26%  | 0.02%      | 0.12% | 0.26% |
| <b>rs477895</b>                    | 0.46% | 0.14%  | 0.24%    | 0.51%  | 0.34%      | 0.33% | 0.16% |
| <b>rs6490294</b>                   | 0.23% | 0.16%  | 0.34%    | 0.00%  | 0.11%      | 0.54% | 0.20% |
| <b>rs8109288</b>                   | 0.27% | 0.17%  | 0.40%    | 1.16%  | 0.08%      | 0.78% | 0.24% |
| <b>rs151361</b>                    | 0.24% | 0.23%  | 1.69%    | 0.00%  | 0.00%      | 0.01% | 0.24% |
| <b><i>MEAN PLATELET VOLUME</i></b> |       |        |          |        |            |       |       |
| <b>rs342296</b>                    | 0.36% | -      | 2.47%    | 3.85%  | 0.01%      | 1.35% | -     |
| <b>rs11653144</b>                  | 1.33% | -      | 0.49%    | 0.55%  | 0.21%      | 1.62% | -     |
| <b>rs8109288</b>                   | 1.15% | -      | 1.12%    | 1.98%  | 0.00%      | 1.47% | -     |
