# Supplementary material for: A Meta-Analysis and Genome-Wide Association Study of Platelet Count and Mean Platelet Volume in African Americans
Source: PLoS Genet. 2012 Mar 8;8(3):e1002491. doi: 10.1371/journal.pgen.1002491 (PMC3299192; doi:10.1371/journal.pgen.1002491)
Supplement: Table S7 — Association of loci previously reported with platelet count in Caucasians, Japanese, or African American populations (from references 13, 15, and 16). (PDF) [file pgen.1002491.s011.pdf]

**Table S7:** Association of loci previously reported with platelet count in Caucasians, Japanese, or African American populations (from references 13, 15, and 16)

| Gene                       | Platelet count associations reported in literature |                           |              |                |                        | Platelet count associations in current study |                |                        |
|----------------------------|----------------------------------------------------|---------------------------|--------------|----------------|------------------------|----------------------------------------------|----------------|------------------------|
|                            | Population (N)                                     | SNP (chr:position)        | allele (MAF) | ES (SE)        | P-value                | Allele (MAF)                                 | ES(SE)         | P-value                |
| <b>GP1BA</b>               | J (14806)                                          | rs6065 (17:4777161)       | T (0.12)     | 0.124 (0.018)  | $2.13 \times 10^{-17}$ | T (0.23)                                     | 3.649 (0.919)  | $7.19 \times 10^{-5}$  |
| <b>SH2B3<sup>a</sup></b>   | J (14806)                                          | rs739496 (12:110372042)   | A (0.16)     | -0.141 (0.016) | $4.75 \times 10^{-19}$ | G (0.32)                                     | -0.028 (0.740) | 0.97                   |
| <b>ARHGEF3<sup>b</sup></b> | W (13943)                                          | rs12485738 (3:56840816)   | A (0.36)     | -5.164 (0.689) | $6.6 \times 10^{-14}$  | A (0.34)                                     | -0.201 (0.736) | 0.78                   |
| <b>HBS1L/MYB</b>           | W (13943)                                          | rs9402686 (6:135469510)   | A (0.22)     | 5.503 (0.750)  | $2.2 \times 10^{-13}$  | A (0.08)                                     | 7.236 (1.312)  | $3.51 \times 10^{-8}$  |
|                            | J (14806)                                          | rs7775698 (6:135460328)   | T (0.34)     | 0.093 (0.012)  | $2.54 \times 10^{-14}$ | T (0.21)                                     | 4.008 (0.901)  | $8.68 \times 10^{-6}$  |
| <b>PIK3CG</b>              | W (13943)                                          | rs342293 (7:106159455)    | G (0.45)     | -3.684 (0.668) | $3.5 \times 10^{-8}$   | G (0.39)                                     | -4.055 (0.717) | $1.58 \times 10^{-8}$  |
| <b>AK3-RCL1</b>            | W (13943)                                          | rs385893 (9:4753176)      | T (0.44)     | 6.264 (0.753)  | $8.5 \times 10^{-17}$  | C (0.29)                                     | 2.518 (0.968)  | $9.3 \times 10^{-3}$   |
|                            | J (14806)                                          |                           | T (0.25)     | -0.099 (0.014) | $2.95 \times 10^{-13}$ |                                              |                |                        |
| <b>THPO<sup>c</sup></b>    | J (14806)                                          | rs6141 (3:185572960)      | T (0.45)     | 0.076 (0.012)  | $5.38 \times 10^{-11}$ | C (0.10)                                     | -1.996 (1.228) | 0.10                   |
| <b>BAK1</b>                | W (13943)                                          | rs210135 (6:33648670)     | T (0.32)     | 5.438 (0.868)  | $3.7 \times 10^{-10}$  | T (0.28)                                     | -5.988 (0.784) | $2.18 \times 10^{-14}$ |
| <b>BAK1</b>                | AA (7112)                                          | rs449242 (6:33604692)     | T (0.33)     | -0.126 (0.023) | $6.2 \times 10^{-8}$   | T (0.37)                                     | -4.408 (0.737) | $2.26 \times 10^{-9}$  |
| <b>BET1L</b>               | W (13943)                                          | rs11602954 (11:192856)    | A (0.23)     | 6.116 (0.859)  | $1.1 \times 10^{-12}$  | A (0.07)                                     | 3.122 (1.441)  | 0.03                   |
| <b>ATXN2<sup>d</sup></b>   | W (13943)                                          | rs11065987 (12:110556807) | G (0.34)     | 5.073 (0.692)  | $2.2 \times 10^{-13}$  | G (0.07)                                     | 2.814 (2.072)  | 0.17                   |
| <b>PTPN11</b>              | W (13943)                                          | rs11066301 (12:111355755) | G (0.35)     | 4.650 (0.680)  | $7.7 \times 10^{-12}$  | G (0.09)                                     | 3.146 (1.418)  | 0.03                   |
| <b>TPM4</b>                | W (23439)                                          | rs8109288 (19:16046559)   | A (0.02)     | -0.232 (0.044) | $3.0 \times 10^{-7}$   | A (0.10)                                     | -8.724 (1.403) | $5.03 \times 10^{-10}$ |
|                            | AA (7112)                                          |                           | A (0.09)     | -0.159 (0.030) | $3.0 \times 10^{-7}$   |                                              |                |                        |
| <b>NFE2-COPZ1</b>          | AA (7112)                                          | rs10876550 (12:52998575)  | G (0.12)     | -0.135 (0.027) | $1.6 \times 10^{-6}$   | G (0.13)                                     | -3.631 (1.041) | $4.84 \times 10^{-4}$  |

MAF = minor allele frequency; ES = effect size; SE = standard error; MPV = mean platelet volume; J = Japanese; W = Caucasians; AA = African Americans

The following SNPs in the current study were close to the previously reported SNPs associated with platelet count and had low p values:

<sup>a</sup> rs14555 is about 1.7 kbps away from rs739496 and has a p-value of  $8.32 \times 10^{-8}$ , minor allele=T, MAF = 35%, effect size (SE) = 4.071(0.759) . In HapMap data, rs14555 is monomorphic in CEU population.

<sup>b</sup> rs17216816 is about 6.7 kbp away from rs12485738 and has a p-value of  $4.04 \times 10^{-5}$ , minor allele = T, MAF = 14%, effect size (SE) = 4.297 (1.047). In HapMap data, the two SNPs (rs17216816 and rs12485738) have  $r^2$  of 87% in CEU population and both SNPs are in the same LD block.

<sup>c</sup> rs10513797 is about 2.2 kbp away from rs6141 and has a p-value of  $8.16 \times 10^{-5}$ , minor allele = A, MAF = 21%, effect size (SE) = 3.349 (0.850). In HapMap data, the two SNPs (rs10513797 and rs6141) have  $r^2$  of 85% in JPT population and are in the same LD block.

<sup>d</sup> rs9300319 is about 7.5 kbp away from rs11065987 and has a p-value of  $1.42 \times 10^{-8}$ , minor allele = T, MAF = 33%, effect size (SE) = -4.26 (0.752). In HapMap data, the two SNPs (rs9300319 and rs11065987) have  $r^2$  of 19% and are in the same LD block.

Minor allele frequencies may be different for platelet count and MPV in the current study due to different number of studies
